# Supplementary material for: Shot-Gun Proteomic Analysis on Roots of Arabidopsis pldα1 Mutants Suggesting the Involvement of PLDα1 in Mitochondrial Protein Import, Vesicular Trafficking and Glucosinolate Biosynthesis
Source: MDPI journal article supplement (doi:10.3390/ijms20010082), 2018-12-26
Supplement: s1 [file s1]

## Supplementary Material

# Shot-Gun Proteomic Analysis on Roots of Arabidopsis *Pldα1* Mutants Suggesting involvement of *Pldα1* in Mitochondrial Protein Import, Vesicular Trafficking and Glucosinolate Biosynthesis

Tomáš Takáč<sup>1</sup>, Olga Šamajová<sup>1</sup>, Pavol Vadovič<sup>1</sup>, Tibor Pechan<sup>2</sup>, Jozef Šamaj<sup>1\*</sup>

\* Correspondence: Jozef Šamaj, jozef.samaj@upol.cz

Table S1. Quantification details of proteins identified in roots of Arabidopsis *plda1-1* and *plda1-2* mutant seedlings. n.a. = not applicable

| Protein accession |         |                                                                                | fold change             |                          | p value                 |                         | Total Score | Total Peptides | Total % Seq Coverage | Total Spectra |
|-------------------|---------|--------------------------------------------------------------------------------|-------------------------|--------------------------|-------------------------|-------------------------|-------------|----------------|----------------------|---------------|
| TAIR              | UNIPROT | Sequence Name                                                                  | <i>plda1-1</i> vs Col-0 | <i>plda1-2</i> vs Col-0  | <i>plda1-1</i> vs Col-0 | <i>plda1-2</i> vs Col-0 |             |                |                      |               |
| Stress response   |         |                                                                                |                         |                          |                         |                         |             |                |                      |               |
| AT2G01540         | Q9ZVF1  | CAR10_ARATH Protein C2-DOMAIN ABA-RELATED 10                                   | Unique in Col-0         |                          | n.a.                    |                         | 9.95        | 3              | 26.67                | 3             |
| AT2G45960         | Q06611  | PIP12_ARATH Aquaporin PIP1-2                                                   | 2.77                    |                          | 0.046                   |                         | 14.41       | 3              | 27.27                | 13            |
| AT3G53420         | P43286  | PIP21_ARATH Aquaporin PIP2-1                                                   | 4.66                    |                          | 0.036                   |                         | 8.42        | 2              | 18.12                | 9             |
| AT1G20450         | P42759  | ERD10_ARATH Dehydrin ERD10                                                     |                         | 0.67                     |                         | 0.032                   | 8.60        | 2              | 15.00                | 4             |
| At4g16260         | Q8VZJ2  | BGNEM_ARATH Probable glucan endo-1,3-beta-glucosidase At4g16260                |                         | 0.59                     |                         | 0.003                   | 51.17       | 11             | 55.81                | 125           |
| AT2G02130         | Q9ZUL7  | DEF01_ARATH Defensin-like protein 1                                            | 2.01                    |                          | 0.045                   |                         | 10.88       | 2              | 31.17                | 17            |
| AT4G11650         | P50700  | OSL3_ARATH Osmotin-like protein OSM34                                          | 0.42                    | 0.26                     | 0.048                   | 0.036                   | 9.91        | 2              | 16.39                | 20            |
| At5g03160         | Q9LYW9  | DNJ36_ARATH DnaJ protein P58IPK homolog                                        | 4.03                    | 4.11                     | 0.004                   | 0.026                   | 7.56        | 2              | 7.88                 | 5             |
| At2g24580         | Q9SJA7  | SOX_ARATH Probable sarcosine oxidase                                           |                         | 2.35                     |                         | 0.051                   | 15.55       | 4              | 19.47                | 12            |
| AT5G39570         | Q9FKA5  | Y5957_ARATH Uncharacterized protein At5g39570 (PLD REGULATED PROTEIN1, PLDRP1) | Unique in Col-0         | Unique in Col-0          | n.a.                    | n.a.                    | 8.98        | 2              | 9.19                 | 8             |
| At3g10850         | O24496  | GLO2C_ARATH Hydroxyacylglutathione hydrolase cytoplasmic                       |                         | 1.99                     |                         | 0.013                   | 8.55        | 2              | 16.28                | 12            |
| At5g45510         | Q8VZC7  | DRL36_ARATH Probable disease resistance protein At5g45510                      |                         | Unique in <i>plda1-2</i> |                         | n.a.                    | 7.23        | 2              | 3.85                 | 4             |

|                                          |        |                                                                  |                          |                          |       |       |       |    |       |     |
|------------------------------------------|--------|------------------------------------------------------------------|--------------------------|--------------------------|-------|-------|-------|----|-------|-----|
| AT3G16400                                | Q9SDM9 | JAL28_ARATH Nitrile-specifier protein 1                          |                          | 1.49                     |       | 0.013 | 90.92 | 21 | 54.89 | 161 |
| AT4G25100                                | P21276 | SODF1_ARATH Superoxide dismutase [Fe] 1, chloroplastic           |                          | 2.58                     |       | 0.03  | 10.06 | 2  | 22.17 | 18  |
| AT4G08390                                | Q42592 | APXS_ARATH L-ascorbate peroxidase S, chloroplastic/mitochondrial | 2.25                     |                          | 0.045 |       | 25.21 | 6  | 33.33 | 25  |
| AT4G04840                                | Q8GWF4 | MSRB6_ARATH Peptide methionine sulfoxide reductase B6            | Unique in <i>plda1-1</i> |                          | n.a.  |       | 6.01  | 2  | 19.61 | 3   |
| At5g17820                                | Q43729 | PER57_ARATH Peroxidase 57                                        | 1.58                     |                          | 0.025 |       | 40.87 | 10 | 50.16 | 43  |
| At3g21770                                | Q9LSY7 | PER30_ARATH Peroxidase 30                                        | Unique in <i>plda1-1</i> | Unique in <i>plda1-2</i> | n.a.  | n.a.  | 7.05  | 2  | 10.33 | 3   |
| At2g38380                                | P24102 | PER22_ARATH Peroxidase 22                                        | 1.79                     | 1.99                     | 0.031 | 0.005 | 13.69 | 3  | 18.05 | 19  |
| At2g18150                                | Q9SI16 | PER15_ARATH Peroxidase 15                                        | Unique in Col-0          |                          | n.a.  |       | 13.63 | 4  | 21.60 | 6   |
| AT4G21960                                | Q9SB81 | PER42_ARATH Peroxidase 42                                        | 0.62                     |                          | 0.001 |       | 7.44  | 2  | 9.70  | 3   |
| AT4G35090                                | P25819 | CATA2_ARATH Catalase-2                                           |                          | 0.76                     |       | 0.033 | 40.79 | 9  | 32.32 | 68  |
| AT1G02920                                | Q9SRY5 | GSTF7_ARATH Glutathione S-transferase F7                         | 0.31                     | 0.25                     | 0.053 | 0.036 | 34.78 | 9  | 55.02 | 21  |
| At3g04780                                | Q9SQZ9 | PITH1_ARATH PITH domain-containing protein At3g04780             |                          | 0.68                     |       | 0.05  | 7.05  | 2  | 25.00 | 3   |
| AT5G28840                                | Q93VR3 | GME_ARATH GDP-mannose 3,5-epimerase                              | 0.45                     |                          | 0.013 |       | 10.83 | 3  | 11.14 | 7   |
| AT1G66280                                | Q9C8Y9 | BGL22_ARATH Beta-glucosidase 22                                  |                          | 1.75                     |       | 0.026 | 83.42 | 19 | 49.62 | 129 |
| AT1G66270                                | Q9C525 | BGL21_ARATH Beta-glucosidase 21                                  |                          | 1.78                     |       | 0.020 | 74.98 | 18 | 53.44 | 115 |
| <b>Cytoskeleton</b>                      |        |                                                                  |                          |                          |       |       |       |    |       |     |
| AT4G00680                                | Q570Y6 | ADF8_ARATH Actin-depolymerizing factor 8                         | 0.77                     |                          | 0     |       | 6.61  | 2  | 23.57 | 3   |
| AT2G37620                                | P0CJ46 | ACT1_ARATH Actin-1                                               | 0.68                     |                          | 0.039 |       | 22.96 | 6  | 26.53 | 13  |
| AT1G01750                                | Q9LQ81 | ADF10_ARATH Actin-depolymerizing factor 10                       | 0.66                     |                          | 0.015 |       | 6.59  | 2  | 20.00 | 3   |
| At3g10220                                | Q67Z52 | TBCB_ARATH Tubulin-folding cofactor B                            | Unique in Col-0          |                          | n.a.  |       | 10.23 | 3  | 21.81 | 3   |
| AT3G46010                                | Q39250 | ADF1_ARATH Actin-depolymerizing factor 1                         |                          | 0.24                     |       | 0.014 | 7.54  | 2  | 23.74 | 5   |
| At5g49510                                | P57741 | PFD3_ARATH Probable prefoldin subunit 3                          |                          | Unique in <i>plda1-2</i> |       | n.a.  | 8.09  | 2  | 19.49 | 3   |
| <b>Cell cycle and cell proliferation</b> |        |                                                                  |                          |                          |       |       |       |    |       |     |
| At1g07370                                | Q9M7Q7 | PCNA1_ARATH Proliferating cellular nuclear antigen 1             | 0.47                     |                          | 0.04  |       | 13.75 | 4  | 26.62 | 7   |
| AT3G16640                                | P31265 | TCTP1_ARATH Translationally-controlled tumor protein 1           | 1.49                     |                          | 0.054 |       | 26.34 | 6  | 41.07 | 53  |
| <b>Membrane transport</b>                |        |                                                                  |                          |                          |       |       |       |    |       |     |
| At3g58730                                | Q9XGM1 | VATD_ARATH V-type proton ATPase subunit D                        | 0.57                     |                          | 0.027 |       | 10.27 | 3  | 18.01 | 4   |
| At3g28715                                | Q9LHA4 | VA0D2_ARATH V-type proton ATPase subunit d2                      | 0.20                     |                          | 0.017 |       | 14.03 | 4  | 21.08 | 5   |
| At4g32285                                | Q8S9J8 | CAP1_ARATH Probable clathrin assembly protein At4g32285          | Unique in Col-0          | Unique in Col-0          | n.a.  | n.a.  | 9.44  | 3  | 6.77  | 3   |
| At3g01340                                | Q9SRI1 | SC13A_ARATH Protein transport protein SEC13 homolog A            | 2.55                     | 2.97                     | 0.001 | 0.011 | 12.12 | 3  | 22.85 | 5   |
| At3g15950                                | Q9LSB4 | NAI2_ARATH TSA1-like protein                                     | 1.33                     | 1.71                     | 0.049 | 0.003 | 96.37 | 22 | 43.78 | 131 |

|                                                         |        |                                                                                  |                          |                          |       |       |       |   |       |    |
|---------------------------------------------------------|--------|----------------------------------------------------------------------------------|--------------------------|--------------------------|-------|-------|-------|---|-------|----|
| At2g45140                                               | Q9SHC8 | VAP12_ARATH Vesicle-associated protein 1-2                                       | 1.51                     |                          | 0.047 |       | 7.21  | 2 | 14.23 | 4  |
| At3g56190                                               | Q9SPE6 | SNAA2_ARATH Alpha-soluble NSF attachment protein 2                               | 1.65                     |                          | 0.043 |       | 19.95 | 5 | 25.61 | 19 |
| At3g47810                                               | Q9STT2 | VPS29_ARATH Vacuolar protein sorting-associated protein 29                       | Unique in <i>plda1-1</i> |                          | n.a.  |       | 6.95  | 2 | 25.79 | 4  |
| At5g41950                                               | Q9FHY8 | HLB1_ARATH Protein HLB1                                                          | 0.36                     |                          | 0.001 |       | 10.63 | 3 | 8.85  | 4  |
| At3g24350                                               | Q9LK09 | SYP32_ARATH Syntaxin-32                                                          |                          | Unique in <i>plda1-2</i> |       | n.a.  | 7.17  | 2 | 10.37 | 4  |
| At2g20990                                               | Q9SKR2 | SYT1_ARATH Synaptotagmin-1                                                       |                          | Unique in <i>plda1-2</i> |       | n.a.  | 7.13  | 2 | 5.36  | 4  |
| At1g79830                                               | Q0WVL7 | GOGC5_ARATH Golgin candidate 5                                                   |                          | Unique in <i>plda1-2</i> |       | n.a.  | 6.45  | 2 | 2.82  | 5  |
| At5g16760                                               | Q9SBA5 | ITPK1_ARATH Inositol-tetrakisphosphate 1-kinase 1                                |                          | 2.38                     |       | 0.014 | 13.42 | 4 | 17.55 | 7  |
| At2g24940                                               | Q9SK39 | SBP3_ARATH Probable steroid-binding protein 3                                    |                          | 1.53                     |       | 0.055 | 17.51 | 4 | 48.00 | 32 |
| At1g30690                                               | Q94C59 | PATL4_ARATH Patellin-4                                                           |                          | 2.30                     |       | 0.028 | 18.05 | 4 | 13.52 | 13 |
| <b>Cell wall</b>                                        |        |                                                                                  |                          |                          |       |       |       |   |       |    |
| AT5G10560                                               | Q9LXA8 | BXL6_ARATH Probable beta-D-xylosidase 6                                          |                          | Unique in <i>plda1-2</i> |       | n.a.  | 10.06 | 3 | 5.18  | 4  |
| AT1G12780                                               | Q42605 | UGE1_ARATH Bifunctional UDP-glucose 4-epimerase and UDP-xylose 4-epimerase 1     |                          | Unique in <i>plda1-2</i> |       | n.a.  | 7.53  | 2 | 11.97 | 3  |
| AT4G25250                                               | Q9SB38 | PMEI4_ARATH Pectinesterase inhibitor 4                                           |                          | 0.79                     |       | 0.001 | 6.75  | 2 | 17.59 | 3  |
| At4g11190                                               | Q9T017 | DIR13_ARATH Dirigent protein 13                                                  |                          | 2.81                     |       | 0.03  | 7.85  | 2 | 19.02 | 5  |
| AT1G03870                                               | Q9ZWA8 | FLA9_ARATH Fasciclin-like arabinogalactan protein 9                              |                          | 1.65                     |       | 0.036 | 11.89 | 3 | 15.79 | 7  |
| <b>Mitochondrial protein import and quality control</b> |        |                                                                                  |                          |                          |       |       |       |   |       |    |
| AT1G72750                                               | Q38820 | TI232_ARATH Mitochondrial import inner membrane translocase subunit TIM23-2      | 0.36                     |                          |       | 0.009 | 7.09  | 2 | 18.62 | 4  |
| AT1G61570                                               | Q9XH48 | TIM13_ARATH Mitochondrial import inner membrane translocase subunit TIM13        |                          | 0.55                     |       | 0.001 | 7.90  | 2 | 40.23 | 5  |
| At5g45390                                               | Q94B60 | CLPP4_ARATH ATP-dependent Clp protease proteolytic subunit 4, chloroplastic      |                          | 0.31                     |       | 0.044 | 8.17  | 2 | 18.84 | 6  |
| At5g23140                                               | Q9FN42 | CLPP2_ARATH ATP-dependent Clp protease proteolytic subunit 2, mitochondrial      | Unique in <i>plda1-1</i> |                          | n.a.  |       | 7.54  | 2 | 18.67 | 3  |
| At2g20530                                               | Q9SIL6 | PHB6_ARATH Prohibitin-6, mitochondrial                                           | 0.43                     |                          | 0.052 |       | 8.94  | 2 | 11.89 | 18 |
| At3g19170                                               | Q9LJL3 | PREP1_ARATH Presequence protease 1, chloroplastic/mitochondrial                  |                          | Unique in <i>plda1-2</i> |       | n.a.  | 6.91  | 2 | 3.33  | 3  |
| <b>Mitochondrial respiratory chain</b>                  |        |                                                                                  |                          |                          |       |       |       |   |       |    |
| AT3G54110                                               | O81845 | PUMP1_ARATH Mitochondrial uncoupling protein 1                                   | 1.67                     | 2.14                     | 0.02  | 0.001 | 6.59  | 2 | 7.52  | 3  |
| AT5G11770                                               | Q42577 | NDUS7_ARATH NADH dehydrogenase [ubiquinone] iron-sulfur protein 7, mitochondrial |                          | 0.78                     |       | 0.008 | 3.61  | 1 | 6.42  | 3  |
| AT2G33220                                               | O49313 | NDADB_ARATH NADH dehydrogenase [ubiquinone] 1 alpha subcomplex subunit 13-B      |                          | 0.45                     |       | 0.044 | 7.68  | 2 | 23.78 | 8  |

|                                          |        |                                                                                      |                             |                             |       |       |       |    |       |    |
|------------------------------------------|--------|--------------------------------------------------------------------------------------|-----------------------------|-----------------------------|-------|-------|-------|----|-------|----|
| ATMG0051<br>0                            | P93306 | NDUS2_ARATH NADH dehydrogenase [ubiquinone]<br>iron-sulfur protein 2                 | 0.50                        | 0.56                        | 0.028 | 0.054 | 11.54 | 3  | 11.17 | 6  |
| AT3G52300                                | Q9FT52 | ATP5H_ARATH ATP synthase subunit d, mitochondrial                                    | 1.69                        | 1.57                        | 0.047 | 0.046 | 31.83 | 9  | 37.50 | 22 |
| AT5G13450                                | Q96251 | ATPO_ARATH ATP synthase subunit O, mitochondrial                                     | 1.53                        |                             | 0.005 |       | 27.87 | 7  | 42.86 | 72 |
| AT1G22450                                | Q9S7L9 | CX6B1_ARATH Cytochrome c oxidase subunit 6b-1                                        | Unique in<br><i>plda1-1</i> | Unique in<br><i>plda1-2</i> | n.a.  | n.a.  | 8.19  | 2  | 17.80 | 4  |
| AT5G13490                                | P40941 | ADT2_ARATH ADP,ATP carrier protein 2,<br>mitochondrial                               | 0.51                        |                             | 0.012 |       | 14.52 | 4  | 17.40 | 16 |
| <b>Proteolysis</b>                       |        |                                                                                      |                             |                             |       |       |       |    |       |    |
| AT5G67360                                | O65351 | SBT17_ARATH Subtilisin-like protease SBT1.7                                          | 0.49                        |                             | 0.001 |       | 11.21 | 3  | 9.38  | 5  |
| At5g42970                                | Q8L5U0 | CSN4_ARATH COP9 signalosome complex subunit 4                                        | 3.25                        |                             | 0.001 |       | 10.35 | 3  | 10.33 | 6  |
| At3g59990                                | Q56Y85 | MAP22_ARATH Methionine aminopeptidase 2B                                             | 2.30                        |                             | 0.006 |       | 24.49 | 5  | 19.59 | 20 |
| At1g20850                                | Q9LM66 | XCP2_ARATH Cysteine protease XCP2                                                    |                             | Unique in<br><i>plda1-2</i> |       | n.a.  | 7.74  | 2  | 10.11 | 3  |
| At4g20850                                | F4JVN6 | TPPII_ARATH Tripeptidyl-peptidase 2                                                  |                             | 1.77                        |       | 0.001 | 58.52 | 15 | 18.55 | 41 |
| At2g36060                                | Q9SJ44 | UEV1C_ARATH Ubiquitin-conjugating enzyme E2<br>variant 1C                            |                             | 2.27                        |       | 0.026 | 9.05  | 2  | 24.83 | 13 |
| AT5G23540                                | Q9LT08 | PSDE_ARATH 26S proteasome non-ATPase regulatory<br>subunit 14 homolog                | 0.76                        | 0.72                        | 0.007 | 0.038 | 25.00 | 6  | 35.39 | 40 |
| At5g58290                                | Q9SEI4 | PRS6B_ARATH 26S proteasome regulatory subunit 6B<br>homolog                          |                             | 1.75                        |       | 0.032 | 35.33 | 8  | 37.50 | 40 |
| AT5G09900                                | Q9FIB6 | PS12A_ARATH 26S proteasome non-ATPase regulatory<br>subunit 12 homolog A             |                             | 0.40                        |       | 0.041 | 7.24  | 2  | 8.82  | 3  |
| AT5G20000                                | Q94BQ2 | PRS8B_ARATH 26S proteasome regulatory subunit 8<br>homolog B                         |                             | 1.84                        |       | 0.034 | 29.23 | 7  | 23.39 | 31 |
| At5g35590                                | O81146 | PSA6A_ARATH Proteasome subunit alpha type-6-A                                        |                             | 2.33                        |       | 0.038 | 18.83 | 5  | 27.24 | 18 |
| At2g39960                                | P58684 | SPCS2_ARATH Probable signal peptidase complex<br>subunit 2                           |                             | 0.58                        |       | 0.039 | 9.50  | 3  | 18.75 | 3  |
| <b>Protein folding</b>                   |        |                                                                                      |                             |                             |       |       |       |    |       |    |
| AT5G60640                                | Q9FF55 | PDI14_ARATH Protein disulfide isomerase-like 1-4                                     | 1.84                        |                             | 0.025 |       | 19.04 | 5  | 13.40 | 12 |
| AT5G58710                                | Q9SP02 | CP20A_ARATH Peptidyl-prolyl cis-trans isomerase<br>CYP20-1                           | 1.13                        | 1.56                        | 0.004 | 0.013 | 7.75  | 2  | 16.67 | 4  |
| AT2G04030                                | Q9SIF2 | HS905_ARATH Heat shock protein 90-5, chloroplastic                                   |                             | 0.39                        |       | 0.031 | 36.71 | 9  | 22.69 | 28 |
| <b>Translation and protein synthesis</b> |        |                                                                                      |                             |                             |       |       |       |    |       |    |
| At3g15000                                | Q9LKA5 | MORF8_ARATH Multiple organellar RNA editing factor<br>8, chloroplastic/mitochondrial | 0.79                        |                             | 0.001 |       | 6.60  | 2  | 6.08  | 3  |
| At5g60790                                | Q9FJH6 | AB1F_ARATH ABC transporter F family member 1                                         | Unique in<br>Col-0          | 0.38                        | n.a.  | 0.03  | 6.98  | 2  | 6.22  | 3  |
| AT5G61030                                | Q9FNR1 | RBG3_ARATH Glycine-rich RNA-binding protein 3,<br>mitochondrial                      | 0.37                        |                             | 0.04  |       | 7.15  | 2  | 12.30 | 4  |
| AT5G23740                                | P42733 | RS113_ARATH 40S ribosomal protein S11-3                                              |                             | 0.16                        |       | 0.03  | 10.03 | 3  | 25.79 | 3  |

|                                   |        |                                                                                 |                 |                          |       |       |       |    |       |    |
|-----------------------------------|--------|---------------------------------------------------------------------------------|-----------------|--------------------------|-------|-------|-------|----|-------|----|
| AT5G18380                         | Q42340 | RS163_ARATH 40S ribosomal protein S16-3                                         | Unique in Col-0 |                          |       | n.a.  | 10.69 | 3  | 18.49 | 6  |
| AT2G09990                         | Q9SK22 | RS161_ARATH 40S ribosomal protein S16-1                                         | Unique in Col-0 |                          |       | n.a.  | 6.49  | 2  | 17.12 | 3  |
| AT5G61170                         | Q9FNP8 | RS193_ARATH 40S ribosomal protein S19-3                                         |                 | 1.80                     |       | 0.045 | 16.50 | 4  | 30.07 | 25 |
| AT5G46430                         | Q9FHG2 | RL322_ARATH 60S ribosomal protein L32-2                                         | 0.48            |                          |       | 0.021 | 7.49  | 2  | 21.05 | 3  |
| AT5G22440                         | P59231 | R10A3_ARATH 60S ribosomal protein L10a-3                                        |                 | 1.69                     |       | 0.046 | 22.23 | 6  | 28.57 | 25 |
| AT4G00810                         | O23095 | RLA12_ARATH 60S acidic ribosomal protein P1-2                                   | 1.52            |                          | 0.052 |       | 9.86  | 2  | 50.44 | 18 |
| At2g39460                         | Q8LD46 | R23A1_ARATH 60S ribosomal protein L23a-1                                        | 20.82           | 7.62                     | 0.001 | 0.012 | 9.56  | 3  | 24.68 | 11 |
| At3g57290                         | Q9C5Z3 | EIF3E_ARATH Eukaryotic translation initiation factor 3 subunit E                | 0.59            |                          | 0.001 |       | 12.24 | 3  | 10.88 | 9  |
| At3g51800                         | Q96327 | EBP1_ARATH ERBB-3 BINDING PROTEIN 1                                             | 1.79            |                          | 0.032 |       | 24.68 | 6  | 28.06 | 21 |
| AT4G17520                         | O23593 | RGGB_ARATH RGG repeats nuclear RNA binding protein B                            | 1.67            |                          | 0.032 |       | 8.36  | 2  | 11.11 | 6  |
| AT1G14610                         | P93736 | SYVM1_ARATH Valine--tRNA ligase, mitochondrial 1                                | 0.76            |                          | 0.003 |       | 7.44  | 2  | 4.51  | 3  |
| AT5G26830                         | O04630 | SYTM1_ARATH Threonine--tRNA ligase, mitochondrial 1                             |                 | 0.49                     |       | 0.041 | 14.08 | 4  | 7.19  | 6  |
| At3g02760                         | F4IYF8 | SYHC_ARATH Histidine--tRNA ligase, cytoplasmic                                  |                 | 0.42                     |       | 0.043 | 10.89 | 3  | 6.80  | 4  |
| AT5G11170                         | Q56XG6 | RH15_ARATH DEAD-box ATP-dependent RNA helicase 15                               |                 | 0.55                     |       | 0.05  | 25.39 | 6  | 22.95 | 30 |
| At1g73230                         | Q9CAT7 | BTF3L_ARATH Nascent polypeptide-associated complex subunit beta                 |                 | 0.58                     |       | 0.033 | 23.69 | 6  | 41.82 | 17 |
| At2g33840                         | Q8S9J2 | BTF3L_ARATH Nascent polypeptide-associated complex subunit beta                 |                 | 0.71                     |       | 0.049 | 8.37  | 2  | 7.01  | 6  |
| AT3G12390                         | Q9LHG9 | NACA1_ARATH Nascent polypeptide-associated complex subunit alpha-like protein 1 | 1.82            | 1.91                     | 0.052 | 0.029 | 33.15 | 7  | 47.78 | 56 |
| At5g13850                         | Q6ICZ8 | NACA3_ARATH Nascent polypeptide-associated complex subunit alpha-like protein 3 |                 | 2.28                     |       | 0.051 | 17.89 | 4  | 39.22 | 22 |
| <b>Nuclear import</b>             |        |                                                                                 |                 |                          |       |       |       |    |       |    |
| AT1G02690                         | Q9FWY7 | IMPA6_ARATH Importin subunit alpha-6                                            | 0.40            |                          | 0.049 |       | 7.31  | 2  | 5.39  | 5  |
| AT3G63130                         | Q9LE82 | RAGP1_ARATH RAN GTPase-activating protein 1                                     |                 | Unique in <i>plda1-2</i> |       | n.a.  | 6.57  | 2  | 5.61  | 3  |
| <b>Glucosinolate biosynthesis</b> |        |                                                                                 |                 |                          |       |       |       |    |       |    |
| AT1G31180                         | Q9SA14 | LEU31_ARATH 3-isopropylmalate dehydrogenase 1, chloroplastic                    | 1.52            | 1.55                     | 0.019 | 0.02  | 27.76 | 7  | 17.33 | 45 |
| AT1G80560                         | P93832 | LEU32_ARATH 3-isopropylmalate dehydrogenase 2, chloroplastic                    |                 | 2.33                     |       | 0.055 | 20.95 | 5  | 17.04 | 30 |
| AT5G14200                         | Q9FMT1 | LEU33_ARATH 3-isopropylmalate dehydrogenase 3, chloroplastic                    | 1.49            | 1.61                     | 0.002 | 0.001 | 46.68 | 11 | 35.21 | 90 |
| AT2G43090                         | Q9ZW85 | LEUD3_ARATH 3-isopropylmalate dehydratase small subunit 3                       |                 | 1.60                     |       | 0.044 | 17.44 | 4  | 24.70 | 36 |

|                                         |        |                                                                             |                 |                          |       |       |       |    |       |     |
|-----------------------------------------|--------|-----------------------------------------------------------------------------|-----------------|--------------------------|-------|-------|-------|----|-------|-----|
| AT5G23010                               | Q9FG67 | MAM1_ARATH Methylthioalkylmalate synthase 1, chloroplastic                  | 1.13            | 1.74                     | 0.001 | 0.036 | 6.79  | 2  | 6.13  | 4   |
| AT4G31500                               | O65782 | C83B1_ARATH Cytochrome P450 83B1                                            | 4.06            |                          | 0.001 |       | 6.51  | 2  | 8.02  | 3   |
| AT2G30860                               | O80852 | GSTF9_ARATH Glutathione S-transferase F9                                    | 1.55            |                          | 0.035 |       | 42.01 | 9  | 48.37 | 93  |
| AT1G21100                               | Q9LPU5 | IGMT1_ARATH Indole glucosinolate O-methyltransferase 1                      |                 | 0.66                     |       | 0.001 | 6.99  | 2  | 6.43  | 4   |
| AT2G14750                               | Q43295 | APK1_ARATH Adenylyl-sulfate kinase 1, chloroplastic                         |                 | Unique in <i>plda1-2</i> |       | n.a.  | 10.00 | 3  | 21.01 | 3   |
| AT5G27380                               | P46416 | GSHB_ARATH Glutathione synthetase, chloroplastic                            |                 | Unique in Col-0          |       | n.a.  | 6.56  | 2  | 6.12  | 3   |
| <b>Camalexin biosynthesis</b>           |        |                                                                             |                 |                          |       |       |       |    |       |     |
| AT1G02930                               | P42760 | GSTF6_ARATH Glutathione S-transferase F6                                    | 0.29            | 0.26                     | 0.049 | 0.029 | 24.60 | 6  | 47.12 | 18  |
| At2g30750                               | O49340 | C71AC_ARATH Cytochrome P450 71A12                                           | Unique in Col-0 | Unique in Col-0          | n.a.  | n.a.  | 14.29 | 4  | 15.29 | 5   |
| <b>Auxin biosynthesis and transport</b> |        |                                                                             |                 |                          |       |       |       |    |       |     |
| AT3G44310                               | P32961 | NRL1_ARATH Nitrilase 1                                                      | 1.79            | 1.79                     | 0.018 | 0.023 | 13.40 | 3  | 16.76 | 22  |
| AT3G02260                               | Q9SRU2 | BIG_ARATH Auxin transport protein BIG                                       | 1.97            |                          | 0.009 |       | 7.52  | 2  | 0.84  | 3   |
| AT5G54810                               | P14671 | TRPB1_ARATH Tryptophan synthase beta chain 1, chloroplastic                 | 0.48            |                          | 0.051 |       | 25.05 | 6  | 21.06 | 27  |
| <b>Fatty acid metabolism</b>            |        |                                                                             |                 |                          |       |       |       |    |       |     |
| At5g64440                               | Q7XJJ7 | FAAH_ARATH Fatty acid amide hydrolase                                       |                 | Unique in <i>plda1-2</i> |       | n.a.  | 7.85  | 2  | 5.27  | 3   |
| At1g54000                               | Q1H583 | GDL18_ARATH GDSL esterase/lipase 22                                         |                 | 1.72                     |       | 0.006 | 50.51 | 11 | 46.29 | 110 |
| At1g54010                               | Q8W4H8 | GDL19_ARATH Inactive GDSL esterase/lipase-like protein 23                   |                 | 1.59                     |       | 0.054 | 45.38 | 11 | 44.04 | 79  |
| <b>Metabolism</b>                       |        |                                                                             |                 |                          |       |       |       |    |       |     |
| AT1G31860                               | O82768 | HIS2_ARATH Histidine biosynthesis bifunctional protein hisIE, chloroplastic |                 | Unique in <i>plda1-2</i> |       | n.a.  | 8.78  | 2  | 11.74 | 4   |
| AT1G60680                               | Q84M96 | ALKR2_ARATH Probable aldo-keto reductase 2                                  |                 | 0.41                     |       | 0.000 | 8.40  | 2  | 7.80  | 4   |
| AT2G43940                               | Q6AWU6 | HOL3_ARATH Probable thiol methyltransferase 2                               |                 | 1.79                     |       | 0.000 | 7.19  | 2  | 18.58 | 6   |
| AT5G17310                               | P57751 | UGPA1_ARATH UTP--glucose-1-phosphate uridylyltransferase 1                  |                 | 1.54                     |       | 0.038 | 43.14 | 11 | 35.53 | 50  |
| AT5G51970                               | Q9FJ95 | DHSO_ARATH Sorbitol dehydrogenase                                           |                 | 2.77                     |       | 0.005 | 17.30 | 4  | 21.98 | 20  |
| AT3G57050                               | P53780 | METC_ARATH Cystathionine beta-lyase, chloroplastic                          |                 | 5.50                     |       | 0.005 | 8.45  | 2  | 7.97  | 7   |
| AT5G13110                               | Q9FY99 | G6PD2_ARATH Glucose-6-phosphate 1-dehydrogenase 2, chloroplastic            |                 | 2.58                     |       | 0.007 | 19.33 | 5  | 12.08 | 16  |
| AT5G53460                               | Q9LV03 | GLUT1_ARATH Glutamate synthase 1 [NADH], chloroplastic                      |                 | 0.41                     |       | 0.009 | 10.62 | 3  | 2.72  | 3   |
| AT5G57440                               | Q8VZP1 | GPP2_ARATH (DL)-glycerol-3-phosphatase 2                                    |                 | 0.36                     |       | 0.011 | 10.95 | 3  | 22.08 | 5   |
| AT1G23800                               | Q8S528 | AL2B7_ARATH Aldehyde dehydrogenase family 2 member B7, mitochondrial        |                 | 2.51                     |       | 0.032 | 19.14 | 5  | 18.54 | 18  |

|           |        |                                                                                                                                |                          |                          |       |       |       |    |       |    |
|-----------|--------|--------------------------------------------------------------------------------------------------------------------------------|--------------------------|--------------------------|-------|-------|-------|----|-------|----|
| AT4G26900 | Q9SZ30 | HIS4_ARATH Imidazole glycerol phosphate synthase hisHF, chloroplastic                                                          | 1.82                     | 0.035                    | 12.26 | 3     | 8.61  | 9  |       |    |
| AT2G45790 | O80840 | PMM_ARATH Phosphomannomutase                                                                                                   | 1.92                     | 0.037                    | 26.59 | 7     | 37.40 | 20 |       |    |
| AT3G48560 | P17597 | ILVB_ARATH Acetolactate synthase, chloroplastic                                                                                | 0.35                     | 0.043                    | 16.00 | 4     | 11.94 | 5  |       |    |
| AT2G26080 | O80988 | GCSP2_ARATH Glycine dehydrogenase (decarboxylating) 2, mitochondrial                                                           | 0.63                     | 0.048                    | 24.24 | 6     | 11.21 | 18 |       |    |
| AT3G15730 | Q38882 | PLDA1_ARATH Phospholipase D alpha 1                                                                                            | Unique in Col-0          | Unique in Col-0          | n.a.  | n.a.  | 25.95 | 6  | 15.31 | 15 |
| AT5G66120 | Q8VYV7 | DHQS_ARATH 3-dehydroquinase synthase, chloroplastic                                                                            | 0.39                     | 0.44                     | 0.046 | 0.01  | 13.45 | 4  | 15.38 | 6  |
| AT1G79500 | Q9AV97 | KDSA1_ARATH 2-dehydro-3-deoxyphosphooctonate aldolase 1                                                                        | Unique in <i>plda1-1</i> | Unique in <i>plda1-2</i> | n.a.  | n.a.  | 7.54  | 2  | 9.66  | 4  |
| AT5G43280 | Q9FHR8 | DCI1_ARATH Delta(3,5)-Delta(2,4)-dienoyl-CoA isomerase, peroxisomal                                                            | 0.44                     | 0.3                      | 0.011 | 0.003 | 11.95 | 3  | 20.14 | 7  |
| AT5G47720 | Q9FIK7 | THIC2_ARATH Probable acetyl-CoA acetyltransferase, cytosolic 2                                                                 | 0.59                     | 1.71                     | 0.042 | 0.055 | 11.47 | 3  | 14.94 | 4  |
| AT5G55070 | Q9FLQ4 | ODO2A_ARATH Dihydrolipoyllysine-residue succinyltransferase component of 2-oxoglutarate dehydrogenase complex 1, mitochondrial | 8.28                     | 5.54                     | 0.008 | 0.037 | 8.26  | 2  | 8.62  | 10 |
| AT2G13560 | Q9SIU0 | MAO1_ARATH NAD-dependent malic enzyme 1, mitochondrial                                                                         | 4.99                     | 2.1                      | 0.011 | 0.009 | 9.70  | 3  | 9.63  | 4  |
| AT5G65720 | O49543 | MNIF1_ARATH Cysteine desulfurase, mitochondrial                                                                                | Unique in <i>plda1-1</i> |                          | n.a.  |       | 10.59 | 3  | 11.48 | 3  |
| AT5G66280 | Q9SNY3 | GMD1_ARATH GDP-mannose 4,6 dehydratase 1                                                                                       | Unique in <i>plda1-1</i> |                          | n.a.  |       | 8.08  | 2  | 13.30 | 4  |
| AT2G18230 | P21216 | IPYR2_ARATH Soluble inorganic pyrophosphatase 2                                                                                | Unique in <i>plda1-1</i> |                          | n.a.  |       | 6.93  | 2  | 20.64 | 3  |
| AT2G44530 | O64888 | KPRS5_ARATH Ribose-phosphate pyrophosphokinase 5, chloroplastic                                                                | Unique in <i>plda1-1</i> |                          | n.a.  |       | 6.92  | 2  | 11.42 | 3  |
| AT4G26910 | Q8H107 | ODO2B_ARATH Dihydrolipoyllysine-residue succinyltransferase component of 2-oxoglutarate dehydrogenase complex 2, mitochondrial | 12.21                    |                          | 0.001 |       | 8.09  | 2  | 8.62  | 4  |
| AT5G01410 | Q8L940 | PDX13_ARATH Pyridoxal 5'-phosphate synthase subunit PDX1.3                                                                     | 0.45                     |                          | 0.001 |       | 7.03  | 2  | 9.06  | 3  |
| AT5G20250 | Q8RX87 | RFS6_ARATH Probable galactinol--sucrose galactosyltransferase 6                                                                | 1.95                     |                          | 0.001 |       | 6.93  | 2  | 3.60  | 3  |
| ATCG00120 | P56757 | ATPA_ARATH ATP synthase subunit alpha, chloroplastic                                                                           | 6.54                     |                          | 0.001 |       | 6.56  | 2  | 6.51  | 6  |
| AT1G63000 | Q9LQ04 | RMLCD_ARATH Bifunctional dTDP-4-dehydrorhamnose 3,5-epimerase/dTDP-4-dehydrorhamnose reductase                                 | 1.38                     | 1.6                      | 0.038 | 0.029 | 24.68 | 6  | 33.55 | 43 |
| AT4G22570 | Q9SUW2 | APT3_ARATH Adenine phosphoribosyltransferase 3                                                                                 | 0.37                     |                          | 0.009 |       | 6.60  | 2  | 18.03 | 4  |

|             |        |                                                                                   |      |                          |       |       |    |       |    |
|-------------|--------|-----------------------------------------------------------------------------------|------|--------------------------|-------|-------|----|-------|----|
| AT1G17745   | O04130 | SERA2_ARATH D-3-phosphoglycerate dehydrogenase 2, chloroplastic                   | 0.30 |                          | 0.021 | 18.10 | 5  | 11.54 | 7  |
| AT2G47510   | P93033 | FUM1_ARATH Fumarate hydratase 1, mitochondrial                                    | 1.57 |                          | 0.040 | 25.70 | 6  | 25.00 | 24 |
| AT4G22930   | O04904 | PYRC_ARATH Dihydroorotase, mitochondrial                                          | 2.77 |                          | 0.044 | 19.59 | 5  | 20.69 | 15 |
| AT4G09510   | Q67XD9 | CINV2_ARATH Alkaline/neutral invertase CINV2                                      | 0.46 |                          | 0.044 | 7.84  | 2  | 8.60  | 8  |
| AT4G25840   | F4JTE7 | GPP1_ARATH (DL)-glycerol-3-phosphatase 1, mitochondrial                           | 2.83 |                          | 0.054 | 9.66  | 3  | 18.46 | 3  |
| AT1G13280   | Q93ZC5 | AOC4_ARATH Allene oxide cyclase 4, chloroplastic                                  | 1.60 |                          | 0.055 | 7.72  | 2  | 14.96 | 7  |
| AT1G16350   | Q9SA34 | IMDH2_ARATH Inosine-5'-monophosphate dehydrogenase 2                              |      | 2.39                     | 0.043 | 20.65 | 5  | 16.53 | 15 |
| AT1G67280   | Q8W593 | LGUC_ARATH Probable lactoylglutathione lyase, chloroplastic                       |      | 2.75                     | 0.021 | 7.74  | 2  | 14.00 | 6  |
| AT3G08590   | Q9M9K1 | PMG2_ARATH Probable 2,3-bisphosphoglycerate-independent phosphoglycerate mutase 2 |      | 0.75                     | 0.053 | 69.89 | 17 | 49.46 | 86 |
| AT4G34215   | Q8L9J9 | CAES_ARATH Probable carbohydrate esterase At4g34215                               |      | 0.74                     | 0.031 | 3.69  | 1  | 5.77  | 3  |
| AT4G33010   | Q94B78 | GCSP1_ARATH Glycine dehydrogenase (decarboxylating) 1, mitochondrial              |      | 0.67                     | 0.033 | 23.02 | 6  | 9.84  | 21 |
| AT3G48170   | Q9STS1 | BADH2_ARATH Betaine aldehyde dehydrogenase 2, mitochondrial                       | 4.26 |                          | 0.005 | 7.97  | 2  | 8.15  | 5  |
| AT5G20960   | Q7G193 | ALDO1_ARATH Indole-3-acetaldehyde oxidase                                         |      | 0.64                     | 0.000 | 10.19 | 3  | 4.17  | 3  |
| AT2G37040   | P35510 | PAL1_ARATH Phenylalanine ammonia-lyase 1                                          |      | 0.73                     | 0.052 | 33.72 | 8  | 19.17 | 41 |
| Unknown     |        |                                                                                   |      |                          |       |       |    |       |    |
| AT4G28440   | O49453 | Y4844_ARATH Uncharacterized protein At4g28440                                     |      | 0.80                     | 0.002 | 4.10  | 1  | 10.46 | 3  |
| Histones    |        |                                                                                   |      |                          |       |       |    |       |    |
| At1g52740   | Q9C944 | H2AV3_ARATH Probable histone H2A variant 3                                        |      | Unique in <i>plda1-2</i> | n.a.  | 9.23  | 2  | 32.09 | 4  |
| Methylation |        |                                                                                   |      |                          |       |       |    |       |    |
| At3g12290   | Q9LHH7 | FOLD2_ARATH Bifunctional protein FOLD 2                                           | 0.53 |                          | 0.023 | 11.63 | 3  | 16.05 | 12 |
| At1g15340   | Q9XI36 | MBD10_ARATH Methyl-CpG-binding domain-containing protein 10                       |      | Unique in <i>plda1-2</i> | n.a.  | 11.96 | 3  | 12.50 | 5  |

Table S2. Distribution of protein families among the differentially abundant proteins found in roots of *plda1-1* and *pda1-2* mutants.

| IPS Family                                              | #Seqs | Accession | Protein name                                                                                   | Fold change              |                         |
|---------------------------------------------------------|-------|-----------|------------------------------------------------------------------------------------------------|--------------------------|-------------------------|
|                                                         |       |           |                                                                                                | <i>plda1-1</i> vs Col-0  | <i>plda1-2</i> vs Col-0 |
| (IPR036291) NAD(P)-binding domain superfamily           | 9     | O04130    | SERA2_ARATH D-3-phosphoglycerate dehydrogenase 2, chloroplastic                                | 0.30                     |                         |
|                                                         |       | Q93VR3    | GME_ARATH GDP-mannose 3,5-epimerase                                                            | 0.45                     |                         |
|                                                         |       | Q9LHH7    | FOLD2_ARATH Bifunctional protein FOLD 2                                                        | 0.53                     |                         |
|                                                         |       | Q9LQ04    | RMLCD_ARATH Bifunctional dTDP-4-dehydrorhamnose 3,5-epimerase/dTDP-4-dehydrorhamnose reductase | 1.38                     |                         |
|                                                         |       | Q9SIU0    | MAO1_ARATH NAD-dependent malic enzyme 1, mitochondrial                                         | 4.99                     | 1.60                    |
|                                                         |       | Q9SNY3    | GMD1_ARATH GDP-mannose 4,6 dehydratase 1                                                       | Unique in <i>plda1-1</i> | 2.10                    |
|                                                         |       | Q9FY99    | G6PD2_ARATH Glucose-6-phosphate 1-dehydrogenase 2, chloroplastic                               |                          |                         |
|                                                         |       | Q9FJ95    | DHSO_ARATH Sorbitol dehydrogenase                                                              |                          | 2.58                    |
|                                                         |       | Q42605    | UGE1_ARATH Bifunctional UDP-glucose 4-epimerase and UDP-xylose 4-epimerase 1                   |                          | 2.77                    |
| (IPR036390) Winged helix DNA-binding domain superfamily | 7     | Q9C5Z3    | EIF3E_ARATH Eukaryotic translation initiation factor 3 subunit E                               | 0.59                     |                         |
|                                                         |       | Q96327    | EBP1_ARATH ERBB-3 BINDING PROTEIN 1                                                            | 1.79                     |                         |
|                                                         |       | Q56Y85    | MAP22_ARATH Methionine aminopeptidase 2B                                                       | 2.30                     |                         |
|                                                         |       | Q8L5U0    | CSN4_ARATH COP9 signalosome complex subunit 4                                                  | 3.25                     |                         |
|                                                         |       | Q9FIB6    | PS12A_ARATH 26S proteasome non-ATPase regulatory subunit 12 homolog A                          |                          | 0.40                    |
|                                                         |       | Q9LPU5    | IGMT1_ARATH Indole glucosinolate O-methyltransferase 1                                         |                          | 0.66                    |
|                                                         |       | Q9FNP8    | RS193_ARATH 40S ribosomal protein S19-3                                                        |                          | 1.80                    |
|                                                         |       |           |                                                                                                |                          |                         |
| (IPR010255) Haem peroxidase                             | 6     | Q9SB81    | PER42_ARATH Peroxidase 42                                                                      | 0.62                     |                         |
|                                                         |       | Q43729    | PER57_ARATH Peroxidase 57                                                                      | 1.58                     |                         |
|                                                         |       | P24102    | PER22_ARATH Peroxidase 22                                                                      | 1.79                     | 1.99                    |
|                                                         |       | Q42592    | APXS_ARATH L-ascorbate peroxidase S, chloroplastic/mitochondrial                               | 2.25                     |                         |

|                                                                 |   |        |                                                                       |                             |                             |
|-----------------------------------------------------------------|---|--------|-----------------------------------------------------------------------|-----------------------------|-----------------------------|
|                                                                 |   | Q9LSY7 | PER30_ARATH Peroxidase 30                                             | Unique in<br><i>plda1-1</i> | Unique in<br><i>plda1-2</i> |
|                                                                 |   | Q9SI16 | PER15_ARATH Peroxidase 15                                             | Unique in<br>Col-0          |                             |
| (IPR013785) Aldolase-type TIM barrel                            | 6 | Q8L940 | PDX13_ARATH Pyridoxal 5'-phosphate synthase subunit PDX1.3            | 0.45                        |                             |
|                                                                 |   | Q9FG67 | MAM1_ARATH Methylthioalkylmalate synthase 1, chloroplastic            | 1.13                        | 1.74                        |
|                                                                 |   | Q8RX87 | RFS6_ARATH Probable galactinol--sucrose galactosyltransferase 6       | 1.95                        |                             |
|                                                                 |   | Q9AV97 | KDSA1_ARATH 2-dehydro-3-deoxyphosphooctonate aldolase 1               | Unique in<br><i>plda1-1</i> | Unique in<br><i>plda1-2</i> |
|                                                                 |   | Q9LV03 | GLUT1_ARATH Glutamate synthase 1 [NADH], chloroplastic                |                             | 0.41                        |
|                                                                 |   | Q9SZ30 | HIS4_ARATH Imidazole glycerol phosphate synthase hisHF, chloroplastic |                             | 1.82                        |
| (IPR027417) P-loop containing nucleoside triphosphate hydrolase | 6 | P56757 | ATPA_ARATH ATP synthase subunit alpha, chloroplastic                  | 6.54                        |                             |
|                                                                 |   | Q9FJH6 | AB1F_ARATH ABC transporter F family member 1                          | Unique in<br>Col-0          | 0.38                        |
|                                                                 |   | Q56XG6 | RH15_ARATH DEAD-box ATP-dependent RNA helicase 15                     |                             | 0.55                        |
|                                                                 |   | Q9SEI4 | PRS6B_ARATH 26S proteasome regulatory subunit 6B homolog              |                             | 1.75                        |
|                                                                 |   | Q94BQ2 | PRS8B_ARATH 26S proteasome regulatory subunit 8 homolog B             |                             | 1.84                        |
|                                                                 |   | Q43295 | APK1_ARATH Adenylyl-sulfate kinase 1, chloroplastic                   |                             | Unique in<br><i>plda1-2</i> |
| (IPR000823) Plant peroxidase                                    | 5 | Q9SB81 | PER42_ARATH Peroxidase 42                                             | 0.62                        |                             |
|                                                                 |   | Q43729 | PER57_ARATH Peroxidase 57                                             | 1.58                        |                             |
|                                                                 |   | P24102 | PER22_ARATH Peroxidase 22                                             | 1.79                        | 1.99                        |
|                                                                 |   | Q9LSY7 | PER30_ARATH Peroxidase 30                                             | Unique in<br><i>plda1-1</i> | Unique in<br><i>plda1-2</i> |
|                                                                 |   | Q9SI16 | PER15_ARATH Peroxidase 15                                             | Unique in<br>Col-0          |                             |
| (IPR017853) Glycoside hydrolase superfamily                     | 5 | Q8RX87 | RFS6_ARATH Probable galactinol--sucrose galactosyltransferase 6       | 1.95                        |                             |
|                                                                 |   | Q8VZJ2 | BGNEM_ARATH Probable glucan endo-1,3-beta-glucosidase At4g16260       |                             | 0.59                        |
|                                                                 |   | Q9C8Y9 | BGL22_ARATH Beta-glucosidase 22                                       |                             | 1.75                        |
|                                                                 |   | Q9C525 | BGL21_ARATH Beta-glucosidase 21                                       |                             | 1.78                        |

|                                                                     |   | Q9LXA8 | BXL6_ARATH Probable beta-D-xylosidase 6                               |                             | Unique in<br><i>plda1-2</i> |
|---------------------------------------------------------------------|---|--------|-----------------------------------------------------------------------|-----------------------------|-----------------------------|
| (IPR036388) Winged helix-like DNA-binding domain superfamily        | 5 | Q96327 | EBP1_ARATH ERBB-3 BINDING PROTEIN 1                                   | 1.79                        |                             |
|                                                                     |   | Q56Y85 | MAP22_ARATH Methionine aminopeptidase 2B                              | 2.30                        |                             |
|                                                                     |   | Q8L5U0 | CSN4_ARATH COP9 signalosome complex subunit 4                         | 3.25                        |                             |
|                                                                     |   | Q9FIB6 | PS12A_ARATH 26S proteasome non-ATPase regulatory subunit 12 homolog A |                             | 0.40                        |
|                                                                     |   | Q9LPU5 | IGMT1_ARATH Indole glucosinolate O-methyltransferase 1                |                             | 0.66                        |
| (IPR015421) Pyridoxal phosphate-dependent transferase, major domain | 4 | O49543 | MNIF1_ARATH Cysteine desulfurase, mitochondrial                       | Unique in<br><i>plda1-1</i> |                             |
|                                                                     |   | O80988 | GCSP2_ARATH Glycine dehydrogenase (decarboxylating) 2, mitochondrial  |                             | 0.63                        |
|                                                                     |   | P53780 | METC_ARATH Cystathionine beta-lyase, chloroplastic                    |                             | 5.50                        |
|                                                                     |   | Q94B78 | GCSP1_ARATH Glycine dehydrogenase (decarboxylating) 1, mitochondrial  |                             | 0.67                        |
| (IPR036249) Thioredoxin-like superfamily                            | 4 | P42760 | GSTF6_ARATH Glutathione S-transferase F6                              | 0.29                        | 0.26                        |
|                                                                     |   | Q9SRY5 | GSTF7_ARATH Glutathione S-transferase F7                              | 0.31                        | 0.25                        |
|                                                                     |   | O80852 | GSTF9_ARATH Glutathione S-transferase F9                              | 1.55                        |                             |
|                                                                     |   | Q9FF55 | PDI14_ARATH Protein disulfide isomerase-like 1-4                      | 1.84                        |                             |
| (IPR015422) Pyridoxal phosphate-dependent transferase domain 1      | 4 | O49543 | MNIF1_ARATH Cysteine desulfurase, mitochondrial                       | Unique in<br><i>plda1-1</i> |                             |
|                                                                     |   | O80988 | GCSP2_ARATH Glycine dehydrogenase (decarboxylating) 2, mitochondrial  |                             | 0.63                        |
|                                                                     |   | P53780 | METC_ARATH Cystathionine beta-lyase, chloroplastic                    |                             | 5.50                        |
|                                                                     |   | Q94B78 | GCSP1_ARATH Glycine dehydrogenase (decarboxylating) 1, mitochondrial  |                             | 0.67                        |
| (IPR015424) Pyridoxal phosphate-dependent transferase               | 4 | O49543 | MNIF1_ARATH Cysteine desulfurase, mitochondrial                       | Unique in<br><i>plda1-1</i> |                             |
|                                                                     |   | O80988 | GCSP2_ARATH Glycine dehydrogenase (decarboxylating) 2, mitochondrial  |                             | 0.63                        |
|                                                                     |   | P53780 | METC_ARATH Cystathionine beta-lyase, chloroplastic                    |                             | 5.50                        |
|                                                                     |   | Q94B78 | GCSP1_ARATH Glycine dehydrogenase (decarboxylating) 1, mitochondrial  |                             | 0.67                        |

|                                                               |   |        |                                                                                 |                          |                 |
|---------------------------------------------------------------|---|--------|---------------------------------------------------------------------------------|--------------------------|-----------------|
| (IPR017904) ADF/Cofilin                                       | 3 | Q9LQ81 | ADF10_ARATH Actin-depolymerizing factor 10                                      | 0.66                     |                 |
|                                                               |   | Q570Y6 | ADF8_ARATH Actin-depolymerizing factor 8                                        | 0.77                     |                 |
|                                                               |   | Q39250 | ADF1_ARATH Actin-depolymerizing factor 1                                        |                          | 0.24            |
| (IPR040079) Glutathione Transferase family                    | 3 | P42760 | GSTF6_ARATH Glutathione S-transferase F6                                        | 0.29                     | 0.26            |
|                                                               |   | Q9SRY5 | GSTF7_ARATH Glutathione S-transferase F7                                        | 0.31                     | 0.25            |
|                                                               |   | O80852 | GSTF9_ARATH Glutathione S-transferase F9                                        | 1.55                     |                 |
| (IPR038187) NAC A/B domain superfamily                        | 3 | Q9LHG9 | NACA1_ARATH Nascent polypeptide-associated complex subunit alpha-like protein 1 | 1.82                     | 1.91            |
|                                                               |   | Q9CAT7 | BTF3L_ARATH Nascent polypeptide-associated complex subunit beta                 |                          | 0.58            |
|                                                               |   | Q6ICZ8 | NACA3_ARATH Nascent polypeptide-associated complex subunit alpha-like protein 3 |                          | 2.28            |
| (IPR004429) Isopropylmalate dehydrogenase                     | 3 | Q9FMT1 | LEU33_ARATH 3-isopropylmalate dehydrogenase 3, chloroplastic                    | 1.49                     | 1.61            |
|                                                               |   | Q9SA14 | LEU31_ARATH 3-isopropylmalate dehydrogenase 1, chloroplastic                    | 1.52                     | 1.55            |
|                                                               |   | P93832 | LEU32_ARATH 3-isopropylmalate dehydrogenase 2, chloroplastic                    |                          | 2.33            |
| (IPR029045) ClpP/crotonase-like domain superfamily            | 3 | Q9FHR8 | DCI1_ARATH Delta(3,5)-Delta(2,4)-dienoyl-CoA isomerase, peroxisomal             | 0.44                     | 0.30            |
|                                                               |   | Q9FN42 | CLPP2_ARATH ATP-dependent Clp protease proteolytic subunit 2, mitochondrial     | Unique in <i>plda1-1</i> |                 |
|                                                               |   | Q94B60 | CLPP4_ARATH ATP-dependent Clp protease proteolytic subunit 4, chloroplastic     |                          | 0.31            |
| (IPR011990) Tetratricopeptide-like helical domain superfamily | 3 | Q9FHY8 | HLB1_ARATH Protein HLB1                                                         | 0.36                     |                 |
|                                                               |   | Q9SPE6 | SNAA2_ARATH Alpha-soluble NSF attachment protein 2                              | 1.65                     |                 |
|                                                               |   | Q9LYW9 | DNJ36_ARATH DnaJ protein P58IPK homolog                                         | 4.03                     | 4.11            |
| (IPR020568) Ribosomal protein S5 domain 2-type fold           | 3 | Q9SK22 | RS161_ARATH 40S ribosomal protein S16-1                                         | Unique in Col-0          |                 |
|                                                               |   | Q42340 | RS163_ARATH 40S ribosomal protein S16-3                                         | Unique in Col-0          |                 |
|                                                               |   | Q9SIF2 | HS905_ARATH Heat shock protein 90-5, chloroplastic                              |                          | 0.39            |
| (IPR035892) C2 domain superfamily                             | 3 | Q38882 | PLDA1_ARATH Phospholipase D alpha 1                                             | Unique in Col-0          | Unique in Col-0 |

|                                                                      |   |        |                                                           |                 |                          |
|----------------------------------------------------------------------|---|--------|-----------------------------------------------------------|-----------------|--------------------------|
|                                                                      |   | Q9ZVF1 | CAR10_ARATH Protein C2-DOMAIN ABA-RELATED 10              | Unique in Col-0 |                          |
|                                                                      |   | Q9SKR2 | SYT1_ARATH Synaptotagmin-1                                |                 | Unique in <i>plda1-2</i> |
| (IPR036282) Glutathione S-transferase, C-terminal domain superfamily | 3 | P42760 | GSTF6_ARATH Glutathione S-transferase F6                  | 0.29            | 0.26                     |
|                                                                      |   | Q9SRY5 | GSTF7_ARATH Glutathione S-transferase F7                  | 0.31            | 0.25                     |
|                                                                      |   | O80852 | GSTF9_ARATH Glutathione S-transferase F9                  | 1.55            |                          |
| (IPR029006) ADF-H/Gelsolin-like domain superfamily                   | 3 | Q9LQ81 | ADF10_ARATH Actin-depolymerizing factor 10                | 0.66            |                          |
|                                                                      |   | Q570Y6 | ADF8_ARATH Actin-depolymerizing factor 8                  | 0.77            |                          |
|                                                                      |   | Q39250 | ADF1_ARATH Actin-depolymerizing factor 1                  |                 | 0.24                     |
| (IPR023214) HAD superfamily                                          | 3 | F4JTE7 | GPP1_ARATH (DL)-glycerol-3-phosphatase 1, mitochondrial   | 2.83            |                          |
|                                                                      |   | Q8VZP1 | GPP2_ARATH (DL)-glycerol-3-phosphatase 2                  |                 | 0.36                     |
|                                                                      |   | O80840 | PMM_ARATH Phosphomannomutase                              |                 | 1.92                     |
| (IPR036412) HAD-like superfamily                                     | 3 | F4JTE7 | GPP1_ARATH (DL)-glycerol-3-phosphatase 1, mitochondrial   | 2.83            |                          |
|                                                                      |   | Q8VZP1 | GPP2_ARATH (DL)-glycerol-3-phosphatase 2                  |                 | 0.36                     |
|                                                                      |   | O80840 | PMM_ARATH Phosphomannomutase                              |                 | 1.92                     |
| (IPR036514) SGNH hydrolase superfamily                               | 3 | Q8L9J9 | CAES_ARATH Probable carbohydrate esterase At4g34215       |                 | 0.74                     |
|                                                                      |   | Q8W4H8 | GDL19_ARATH Inactive GDSL esterase/lipase-like protein 23 |                 | 1.59                     |
|                                                                      |   | Q1H583 | GDL18_ARATH GDSL esterase/lipase 22                       |                 | 1.72                     |

Table S3. Gene ontology annotation of differentially abundant proteins found in roots of *plda1-1* and *plda1-2* mutants according to biological process in 4<sup>th</sup> level of gene ontology.

| GO ID      | GO Name                       | Parent from 3 <sup>rd</sup> level of onthology (GO accession) | Parents (Name)                                      | Nodescore | # Proteins | Protein Names                                                                                                                                                                                                                                                                                                                                                                                                                                                                                                                                                                                                                                                                                                                                                                                                                                                                                                                                                                                                                                                                                                                                                                                                                                                                                                                                                                                                                                                                                                                                                                                                                                                                                                                                                                                                                                                                                                                                                                                |
|------------|-------------------------------|---------------------------------------------------------------|-----------------------------------------------------|-----------|------------|----------------------------------------------------------------------------------------------------------------------------------------------------------------------------------------------------------------------------------------------------------------------------------------------------------------------------------------------------------------------------------------------------------------------------------------------------------------------------------------------------------------------------------------------------------------------------------------------------------------------------------------------------------------------------------------------------------------------------------------------------------------------------------------------------------------------------------------------------------------------------------------------------------------------------------------------------------------------------------------------------------------------------------------------------------------------------------------------------------------------------------------------------------------------------------------------------------------------------------------------------------------------------------------------------------------------------------------------------------------------------------------------------------------------------------------------------------------------------------------------------------------------------------------------------------------------------------------------------------------------------------------------------------------------------------------------------------------------------------------------------------------------------------------------------------------------------------------------------------------------------------------------------------------------------------------------------------------------------------------------|
| GO:0044249 | cellular biosynthetic process | GO:0009058,<br>GO:0044237                                     | biosynthetic process,<br>cellular metabolic process | 55.91     | 87         | JAL28_ARATH Nitrile-specifier protein 1<br>PCNA1_ARATH Proliferating cellular nuclear antigen 1<br>UGE1_ARATH Bifunctional UDP-glucose 4-epimerase and UDP-xylose 4-epimerase 1<br>DIR13_ARATH Dirigent protein 13<br>PREP1_ARATH Presequence protease 1, chloroplastic/mitochondrial<br>ATP5H_ARATH ATP synthase subunit d, mitochondrial<br>ATPO_ARATH ATP synthase subunit O, mitochondrial<br>RS113_ARATH 40S ribosomal protein S11-3<br>RS163_ARATH 40S ribosomal protein S16-3<br>RS161_ARATH 40S ribosomal protein S16-1<br>RS193_ARATH 40S ribosomal protein S19-3<br>RL322_ARATH 60S ribosomal protein L32-2<br>R10A3_ARATH 60S ribosomal protein L10a-3<br>RLA12_ARATH 60S acidic ribosomal protein P1-2<br>R23A1_ARATH 60S ribosomal protein L23a-1<br>EIF3E_ARATH Eukaryotic translation initiation factor 3 subunit E<br>SYTM1_ARATH Threonine--tRNA ligase, mitochondrial 1<br>SYHC_ARATH Histidine--tRNA ligase, cytoplasmic<br>BTF3L_ARATH Nascent polypeptide-associated complex subunit beta<br>LEU31_ARATH 3-isopropylmalate dehydrogenase 1, chloroplastic<br>LEU32_ARATH 3-isopropylmalate dehydrogenase 2, chloroplastic<br>LEU33_ARATH 3-isopropylmalate dehydrogenase 3, chloroplastic<br>LEUD3_ARATH 3-isopropylmalate dehydratase small subunit 3<br>MAM1_ARATH Methylthioalkylmalate synthase 1, chloroplastic<br>C83B1_ARATH Cytochrome P450 83B1<br>IGMT1_ARATH Indole glucosinolate O-methyltransferase 1<br>APK1_ARATH Adenylyl-sulfate kinase 1, chloroplastic<br>GSHB_ARATH Glutathione synthetase, chloroplastic<br>NRL1_ARATH Nitrilase 1<br>TRPB1_ARATH Tryptophan synthase beta chain 1, chloroplastic<br>HIS2_ARATH Histidine biosynthesis bifunctional protein hisIE, chloroplastic<br>GLUT1_ARATH Glutamate synthase 1 [NADH], chloroplastic<br>GPP2_ARATH (DL)-glycerol-3-phosphatase 2<br>HIS4_ARATH Imidazole glycerol phosphate synthase hisHF, chloroplastic<br>PMM_ARATH Phosphomannomutase<br>ILVB_ARATH Acetolactate synthase, chloroplastic |

|  |  |  |  |  |                                                                                                                                                                                                                                                                                                                                                                                                                                                                                                                                                                                                                                                                                                                                                                                                                                                                                                                                                                                                       |
|--|--|--|--|--|-------------------------------------------------------------------------------------------------------------------------------------------------------------------------------------------------------------------------------------------------------------------------------------------------------------------------------------------------------------------------------------------------------------------------------------------------------------------------------------------------------------------------------------------------------------------------------------------------------------------------------------------------------------------------------------------------------------------------------------------------------------------------------------------------------------------------------------------------------------------------------------------------------------------------------------------------------------------------------------------------------|
|  |  |  |  |  | DHQS_ARATH 3-dehydroquinate synthase, chloroplastic<br>KDSA1_ARATH 2-dehydro-3-deoxyphosphooctonate aldolase 1<br>MNIF1_ARATH Cysteine desulfurase, mitochondrial<br>GMD1_ARATH GDP-mannose 4,6 dehydratase 1<br>KPRS5_ARATH Ribose-phosphate pyrophosphokinase 5, chloroplastic<br>PDX13_ARATH Pyridoxal 5'-phosphate synthase subunit PDX1.3<br>ATPA_ARATH ATP synthase subunit alpha, chloroplastic<br>RMLCD_ARATH Bifunctional dTDP-4-dehydrorhamnose 3,5-epimerase/dTDP-4-dehydrorhamnose reductase<br>APT3_ARATH Adenine phosphoribosyltransferase 3<br>SERA2_ARATH D-3-phosphoglycerate dehydrogenase 2, chloroplastic<br>PYRC_ARATH Dihydroorotase, mitochondrial<br>GPP1_ARATH (DL)-glycerol-3-phosphatase 1, mitochondrial<br>AOC4_ARATH Allene oxide cyclase 4, chloroplastic<br>IMDH2_ARATH Inosine-5'-monophosphate dehydrogenase 2<br>H2AV3_ARATH Probable histone H2A variant 3<br>FOLD2_ARATH Bifunctional protein FOLD 2<br>MBD10_ARATH Methyl-CpG-binding domain-containing protein |
|--|--|--|--|--|-------------------------------------------------------------------------------------------------------------------------------------------------------------------------------------------------------------------------------------------------------------------------------------------------------------------------------------------------------------------------------------------------------------------------------------------------------------------------------------------------------------------------------------------------------------------------------------------------------------------------------------------------------------------------------------------------------------------------------------------------------------------------------------------------------------------------------------------------------------------------------------------------------------------------------------------------------------------------------------------------------|

|            |                                           |                           |                                                                          |       |    |                                                                                                                                                                                                                                                                                                                                                                                                                                                                                                                                                                                                                                                                                                                                                                                                                                                                                                                                                                                                                                                                                                                                                                                                                                                                                                                                                                                                                                                                                                                                                                                                                                                                                                                                                                                                                                                                                                                                                                                                                                                                                                                                                                                                                                                                                                                                                                                                                      |
|------------|-------------------------------------------|---------------------------|--------------------------------------------------------------------------|-------|----|----------------------------------------------------------------------------------------------------------------------------------------------------------------------------------------------------------------------------------------------------------------------------------------------------------------------------------------------------------------------------------------------------------------------------------------------------------------------------------------------------------------------------------------------------------------------------------------------------------------------------------------------------------------------------------------------------------------------------------------------------------------------------------------------------------------------------------------------------------------------------------------------------------------------------------------------------------------------------------------------------------------------------------------------------------------------------------------------------------------------------------------------------------------------------------------------------------------------------------------------------------------------------------------------------------------------------------------------------------------------------------------------------------------------------------------------------------------------------------------------------------------------------------------------------------------------------------------------------------------------------------------------------------------------------------------------------------------------------------------------------------------------------------------------------------------------------------------------------------------------------------------------------------------------------------------------------------------------------------------------------------------------------------------------------------------------------------------------------------------------------------------------------------------------------------------------------------------------------------------------------------------------------------------------------------------------------------------------------------------------------------------------------------------------|
| GO:1901564 | organonitrogen compound metabolic process | GO:0006807,<br>GO:0071704 | nitrogen compound metabolic process, organic substance metabolic process | 53.72 | 86 | SOX_ARATH Probable sarcosine oxidase<br>JAL28_ARATH Nitrile-specifier protein 1<br>GSTF7_ARATH Glutathione S-transferase F7<br>ATP5H_ARATH ATP synthase subunit d, mitochondrial<br>ATPO_ARATH ATP synthase subunit O, mitochondrial<br>RS113_ARATH 40S ribosomal protein S11-3<br>RS163_ARATH 40S ribosomal protein S16-3<br>RS161_ARATH 40S ribosomal protein S16-1<br>RS193_ARATH 40S ribosomal protein S19-3<br>RL322_ARATH 60S ribosomal protein L32-2<br>R10A3_ARATH 60S ribosomal protein L10a-3<br>RLA12_ARATH 60S acidic ribosomal protein P1-2<br>R23A1_ARATH 60S ribosomal protein L23a-1<br>EIF3E_ARATH Eukaryotic translation initiation factor 3 subunit E<br>SYTM1_ARATH Threonine--tRNA ligase, mitochondrial 1<br>SYHC_ARATH Histidine--tRNA ligase, cytoplasmic<br>LEU31_ARATH 3-isopropylmalate dehydrogenase 1, chloroplastic<br>LEU32_ARATH 3-isopropylmalate dehydrogenase 2, chloroplastic<br>LEU33_ARATH 3-isopropylmalate dehydrogenase 3, chloroplastic<br>LEUD3_ARATH 3-isopropylmalate dehydratase small subunit 3<br>MAM1_ARATH Methylthioalkylmalate synthase 1, chloroplastic<br>C83B1_ARATH Cytochrome P450 83B1<br>GSTF9_ARATH Glutathione S-transferase F9<br>IGMT1_ARATH Indole glucosinolate O-methyltransferase 1<br>APK1_ARATH Adenylyl-sulfate kinase 1, chloroplastic<br>GSHB_ARATH Glutathione synthetase, chloroplastic<br>GSTF6_ARATH Glutathione S-transferase F6<br>NRL1_ARATH Nitrilase 1<br>TRPB1_ARATH Tryptophan synthase beta chain 1, chloroplastic<br>FAAH_ARATH Fatty acid amide hydrolase<br>BGL22_ARATH Beta-glucosidase 22<br>BGL21_ARATH Beta-glucosidase 21<br>HIS2_ARATH Histidine biosynthesis bifunctional protein hisIE, chloroplastic<br>G6PD2_ARATH Glucose-6-phosphate 1-dehydrogenase 2, chloroplastic<br>GLUT1_ARATH Glutamate synthase 1 [NADH], chloroplastic<br>HIS4_ARATH Imidazole glycerol phosphate synthase hisHF, chloroplastic<br>ILVB_ARATH Acetolactate synthase, chloroplastic<br>GCSP2_ARATH Glycine dehydrogenase (decarboxylating) 2, mitochondrial<br>PLDA1_ARATH Phospholipase D alpha 1<br>ODO2A_ARATH Dihydrolipoyllysine-residue succinyltransferase component of 2-oxoglutarate dehydrogenase complex 1, mitochondrial<br>KPRS5_ARATH Ribose-phosphate pyrophosphokinase 5, chloroplastic<br>ODO2B_ARATH Dihydrolipoyllysine-residue succinyltransferase component of 2-oxoglutarate dehydrogenase complex 2, mitochondrial |
|------------|-------------------------------------------|---------------------------|--------------------------------------------------------------------------|-------|----|----------------------------------------------------------------------------------------------------------------------------------------------------------------------------------------------------------------------------------------------------------------------------------------------------------------------------------------------------------------------------------------------------------------------------------------------------------------------------------------------------------------------------------------------------------------------------------------------------------------------------------------------------------------------------------------------------------------------------------------------------------------------------------------------------------------------------------------------------------------------------------------------------------------------------------------------------------------------------------------------------------------------------------------------------------------------------------------------------------------------------------------------------------------------------------------------------------------------------------------------------------------------------------------------------------------------------------------------------------------------------------------------------------------------------------------------------------------------------------------------------------------------------------------------------------------------------------------------------------------------------------------------------------------------------------------------------------------------------------------------------------------------------------------------------------------------------------------------------------------------------------------------------------------------------------------------------------------------------------------------------------------------------------------------------------------------------------------------------------------------------------------------------------------------------------------------------------------------------------------------------------------------------------------------------------------------------------------------------------------------------------------------------------------------|

|  |  |  |  |  |  |                                                                                                                                                                                                                                                                                                                                                                                                                                                                |
|--|--|--|--|--|--|----------------------------------------------------------------------------------------------------------------------------------------------------------------------------------------------------------------------------------------------------------------------------------------------------------------------------------------------------------------------------------------------------------------------------------------------------------------|
|  |  |  |  |  |  | PDX13_ARATH Pyridoxal 5'-phosphate synthase subunit PDX1.3<br>ATPA_ARATH ATP synthase subunit alpha, chloroplastic<br>APT3_ARATH Adenine phosphoribosyltransferase 3<br>SERA2_ARATH D-3-phosphoglycerate dehydrogenase 2, chloroplastic<br>PYRC_ARATH Dihydroorotase, mitochondrial<br>IMDH2_ARATH Inosine-5'-monophosphate dehydrogenase 2<br>GCSP1_ARATH Glycine dehydrogenase (decarboxylating) 1, mitochondrial<br>FOLD2_ARATH Bifunctional protein Fold 2 |
|--|--|--|--|--|--|----------------------------------------------------------------------------------------------------------------------------------------------------------------------------------------------------------------------------------------------------------------------------------------------------------------------------------------------------------------------------------------------------------------------------------------------------------------|

|            |                                                 |                           |                                                                          |       |    |                                                                                                                                                                                                                                                                                                                                                                                                                                                                                                                                                                                                                                                                                                                                                                                                                                                                                                                                                                                                                                                                                                                                                                                                                                                                                                                                                                                                                                                                                                                                                                                                                                                                                                                                                                                                                                                                                                                                                                                                                                                                                                                                                                                                                                                                                                                                                                                                                                                                                                                                                                                                                                 |
|------------|-------------------------------------------------|---------------------------|--------------------------------------------------------------------------|-------|----|---------------------------------------------------------------------------------------------------------------------------------------------------------------------------------------------------------------------------------------------------------------------------------------------------------------------------------------------------------------------------------------------------------------------------------------------------------------------------------------------------------------------------------------------------------------------------------------------------------------------------------------------------------------------------------------------------------------------------------------------------------------------------------------------------------------------------------------------------------------------------------------------------------------------------------------------------------------------------------------------------------------------------------------------------------------------------------------------------------------------------------------------------------------------------------------------------------------------------------------------------------------------------------------------------------------------------------------------------------------------------------------------------------------------------------------------------------------------------------------------------------------------------------------------------------------------------------------------------------------------------------------------------------------------------------------------------------------------------------------------------------------------------------------------------------------------------------------------------------------------------------------------------------------------------------------------------------------------------------------------------------------------------------------------------------------------------------------------------------------------------------------------------------------------------------------------------------------------------------------------------------------------------------------------------------------------------------------------------------------------------------------------------------------------------------------------------------------------------------------------------------------------------------------------------------------------------------------------------------------------------------|
| GO:1901576 | organic<br>substance<br>biosynthetic<br>process | GO:0009058,<br>GO:0071704 | biosynthetic<br>process,<br>organic<br>substance<br>metabolic<br>process | 30.33 | 85 | <p>JAL28_ARATH Nitrile-specifier protein 1</p> <p>PCNA1_ARATH Proliferating cellular nuclear antigen 1</p> <p>ITPK1_ARATH Inositol-tetrakisphosphate 1-kinase 1</p> <p>UGE1_ARATH Bifunctional UDP-glucose 4-epimerase and UDP-xylose 4-epimerase 1</p> <p>DIR13_ARATH Dirigent protein 13</p> <p>PREP1_ARATH Presequence protease 1, chloroplastic/mitochondrial</p> <p>ATP5H_ARATH ATP synthase subunit d, mitochondrial</p> <p>ATPO_ARATH ATP synthase subunit O, mitochondrial</p> <p>RS113_ARATH 40S ribosomal protein S11-3</p> <p>RS163_ARATH 40S ribosomal protein S16-3</p> <p>RS161_ARATH 40S ribosomal protein S16-1</p> <p>RS193_ARATH 40S ribosomal protein S19-3</p> <p>RL322_ARATH 60S ribosomal protein L32-2</p> <p>R10A3_ARATH 60S ribosomal protein L10a-3</p> <p>RLA12_ARATH 60S acidic ribosomal protein P1-2</p> <p>R23A1_ARATH 60S ribosomal protein L23a-1</p> <p>EIF3E_ARATH Eukaryotic translation initiation factor 3 subunit E</p> <p>SYTM1_ARATH Threonine--tRNA ligase, mitochondrial 1</p> <p>SYHC_ARATH Histidine--tRNA ligase, cytoplasmic</p> <p>BTF3L_ARATH Nascent polypeptide-associated complex subunit beta</p> <p>LEU31_ARATH 3-isopropylmalate dehydrogenase 1, chloroplastic</p> <p>LEU32_ARATH 3-isopropylmalate dehydrogenase 2, chloroplastic</p> <p>LEU33_ARATH 3-isopropylmalate dehydrogenase 3, chloroplastic</p> <p>LEUD3_ARATH 3-isopropylmalate dehydratase small subunit 3</p> <p>MAM1_ARATH Methylthioalkylmalate synthase 1, chloroplastic</p> <p>C83B1_ARATH Cytochrome P450 83B1</p> <p>APK1_ARATH Adenylyl-sulfate kinase 1, chloroplastic</p> <p>GSHB_ARATH Glutathione synthetase, chloroplastic</p> <p>NRL1_ARATH Nitrilase 1</p> <p>TRPB1_ARATH Tryptophan synthase beta chain 1, chloroplastic</p> <p>HIS2_ARATH Histidine biosynthesis bifunctional protein hisIE, chloroplastic</p> <p>GLUT1_ARATH Glutamate synthase 1 [NADH], chloroplastic</p> <p>GPP2_ARATH (DL)-glycerol-3-phosphatase 2</p> <p>HIS4_ARATH Imidazole glycerol phosphate synthase hisHF, chloroplastic</p> <p>PMM_ARATH Phosphomannomutase</p> <p>ILVB_ARATH Acetolactate synthase, chloroplastic</p> <p>DHQS_ARATH 3-dehydroquinate synthase, chloroplastic</p> <p>KDSA1_ARATH 2-dehydro-3-deoxyphosphooctonate aldolase 1</p> <p>GMD1_ARATH GDP-mannose 4,6 dehydratase 1</p> <p>KPRS5_ARATH Ribose-phosphate pyrophosphokinase 5, chloroplastic</p> <p>PDX13_ARATH Pyridoxal 5'-phosphate synthase subunit PDX1.3</p> <p>ATPA_ARATH ATP synthase subunit alpha, chloroplastic</p> <p>RMLCD_ARATH Bifunctional dTDP-4-dehydrorhamnose 3,5-epimerase/dTDP-4-dehydrorhamnose reductase</p> |
|------------|-------------------------------------------------|---------------------------|--------------------------------------------------------------------------|-------|----|---------------------------------------------------------------------------------------------------------------------------------------------------------------------------------------------------------------------------------------------------------------------------------------------------------------------------------------------------------------------------------------------------------------------------------------------------------------------------------------------------------------------------------------------------------------------------------------------------------------------------------------------------------------------------------------------------------------------------------------------------------------------------------------------------------------------------------------------------------------------------------------------------------------------------------------------------------------------------------------------------------------------------------------------------------------------------------------------------------------------------------------------------------------------------------------------------------------------------------------------------------------------------------------------------------------------------------------------------------------------------------------------------------------------------------------------------------------------------------------------------------------------------------------------------------------------------------------------------------------------------------------------------------------------------------------------------------------------------------------------------------------------------------------------------------------------------------------------------------------------------------------------------------------------------------------------------------------------------------------------------------------------------------------------------------------------------------------------------------------------------------------------------------------------------------------------------------------------------------------------------------------------------------------------------------------------------------------------------------------------------------------------------------------------------------------------------------------------------------------------------------------------------------------------------------------------------------------------------------------------------------|

|  |  |  |  |  |  |                                                                                                                                                                                                                                                                                                                                                                                                                                                                                                                                     |
|--|--|--|--|--|--|-------------------------------------------------------------------------------------------------------------------------------------------------------------------------------------------------------------------------------------------------------------------------------------------------------------------------------------------------------------------------------------------------------------------------------------------------------------------------------------------------------------------------------------|
|  |  |  |  |  |  | <p>APT3_ARATH Adenine phosphoribosyltransferase 3</p> <p>SERA2_ARATH D-3-phosphoglycerate dehydrogenase 2, chloroplastic</p> <p>PYRC_ARATH Dihydroorotase, mitochondrial</p> <p>GPP1_ARATH (DL)-glycerol-3-phosphatase 1, mitochondrial</p> <p>AOC4_ARATH Allene oxide cyclase 4, chloroplastic</p> <p>IMDH2_ARATH Inosine-5'-monophosphate dehydrogenase 2</p> <p>H2AV3_ARATH Probable histone H2A variant 3</p> <p>FOLD2_ARATH Bifunctional protein Fold 2</p> <p>MBD10_ARATH Methyl-CpG-binding domain-containing protein 10</p> |
|--|--|--|--|--|--|-------------------------------------------------------------------------------------------------------------------------------------------------------------------------------------------------------------------------------------------------------------------------------------------------------------------------------------------------------------------------------------------------------------------------------------------------------------------------------------------------------------------------------------|

|            |                                  |            |                                   |      |    |                                                                                                                                                                                                                                                                                                                                                                                                                                                                                                                                                                                                                                                                                                                                                                                                                                                                                                                                                                                                                                                                                                                                                                                                                                                                                                                                                                                                                                                                                                                                                                                                                                                                                                                                                                                                                                                                                                                                                                                                                                                                                                                                                                                                                                                                                                                                                                                                                                                                                                                                                                                                                                                                                                                                       |
|------------|----------------------------------|------------|-----------------------------------|------|----|---------------------------------------------------------------------------------------------------------------------------------------------------------------------------------------------------------------------------------------------------------------------------------------------------------------------------------------------------------------------------------------------------------------------------------------------------------------------------------------------------------------------------------------------------------------------------------------------------------------------------------------------------------------------------------------------------------------------------------------------------------------------------------------------------------------------------------------------------------------------------------------------------------------------------------------------------------------------------------------------------------------------------------------------------------------------------------------------------------------------------------------------------------------------------------------------------------------------------------------------------------------------------------------------------------------------------------------------------------------------------------------------------------------------------------------------------------------------------------------------------------------------------------------------------------------------------------------------------------------------------------------------------------------------------------------------------------------------------------------------------------------------------------------------------------------------------------------------------------------------------------------------------------------------------------------------------------------------------------------------------------------------------------------------------------------------------------------------------------------------------------------------------------------------------------------------------------------------------------------------------------------------------------------------------------------------------------------------------------------------------------------------------------------------------------------------------------------------------------------------------------------------------------------------------------------------------------------------------------------------------------------------------------------------------------------------------------------------------------------|
| GO:0044281 | small molecule metabolic process | GO:0044710 | single-organism metabolic process | 33.1 | 84 | <p>SOX_ARATH Probable sarcosine oxidase</p> <p>GLO2C_ARATH Hydroxyacylglutathione hydrolase cytoplasmic</p> <p>JAL28_ARATH Nitrile-specifier protein 1</p> <p>ITPK1_ARATH Inositol-tetrakisphosphate 1-kinase 1</p> <p>UGE1_ARATH Bifunctional UDP-glucose 4-epimerase and UDP-xylose 4-epimerase 1</p> <p>ATP5H_ARATH ATP synthase subunit d, mitochondrial</p> <p>ATPO_ARATH ATP synthase subunit O, mitochondrial</p> <p>SYTM1_ARATH Threonine--tRNA ligase, mitochondrial 1</p> <p>SYHC_ARATH Histidine--tRNA ligase, cytoplasmic</p> <p>LEU31_ARATH 3-isopropylmalate dehydrogenase 1, chloroplastic</p> <p>LEU32_ARATH 3-isopropylmalate dehydrogenase 2, chloroplastic</p> <p>LEU33_ARATH 3-isopropylmalate dehydrogenase 3, chloroplastic</p> <p>LEUD3_ARATH 3-isopropylmalate dehydratase small subunit 3</p> <p>C83B1_ARATH Cytochrome P450 83B1</p> <p>IGMT1_ARATH Indole glucosinolate O-methyltransferase 1</p> <p>APK1_ARATH Adenylyl-sulfate kinase 1, chloroplastic</p> <p>GSHB_ARATH Glutathione synthetase, chloroplastic</p> <p>NRL1_ARATH Nitrilase 1</p> <p>TRPB1_ARATH Tryptophan synthase beta chain 1, chloroplastic</p> <p>FAAH_ARATH Fatty acid amide hydrolase</p> <p>BGL22_ARATH Beta-glucosidase 22</p> <p>BGL21_ARATH Beta-glucosidase 21</p> <p>HIS2_ARATH Histidine biosynthesis bifunctional protein hisIE, chloroplastic</p> <p>G6PD2_ARATH Glucose-6-phosphate 1-dehydrogenase 2, chloroplastic</p> <p>GLUT1_ARATH Glutamate synthase 1 [NADH], chloroplastic</p> <p>GPP2_ARATH (DL)-glycerol-3-phosphatase 2</p> <p>HIS4_ARATH Imidazole glycerol phosphate synthase hisHF, chloroplastic</p> <p>PMM_ARATH Phosphomannomutase</p> <p>ILVB_ARATH Acetolactate synthase, chloroplastic</p> <p>GCSP2_ARATH Glycine dehydrogenase (decarboxylating) 2, mitochondrial</p> <p>PLDA1_ARATH Phospholipase D alpha 1</p> <p>DHQS_ARATH 3-dehydroquininate synthase, chloroplastic</p> <p>KDSA1_ARATH 2-dehydro-3-deoxyphosphooctonate aldolase 1</p> <p>DCI1_ARATH Delta(3,5)-Delta(2,4)-dienoyl-CoA isomerase, peroxisomal</p> <p>THIC2_ARATH Probable acetyl-CoA acetyltransferase, cytosolic 2</p> <p>ODO2A_ARATH Dihydrolipoyllysine-residue succinyltransferase component of 2-oxoglutarate dehydrogenase complex 1, mitochondrial</p> <p>MAO1_ARATH NAD-dependent malic enzyme 1, mitochondrial</p> <p>KPRS5_ARATH Ribose-phosphate pyrophosphokinase 5, chloroplastic</p> <p>ODO2B_ARATH Dihydrolipoyllysine-residue succinyltransferase component of 2-oxoglutarate dehydrogenase complex 2, mitochondrial</p> <p>PDX13_ARATH Pyridoxal 5'-phosphate synthase subunit PDX1.3</p> <p>ATPA_ARATH ATP synthase subunit alpha, chloroplastic</p> <p>APT3_ARATH Adenine phosphoribosyltransferase 3</p> |
|------------|----------------------------------|------------|-----------------------------------|------|----|---------------------------------------------------------------------------------------------------------------------------------------------------------------------------------------------------------------------------------------------------------------------------------------------------------------------------------------------------------------------------------------------------------------------------------------------------------------------------------------------------------------------------------------------------------------------------------------------------------------------------------------------------------------------------------------------------------------------------------------------------------------------------------------------------------------------------------------------------------------------------------------------------------------------------------------------------------------------------------------------------------------------------------------------------------------------------------------------------------------------------------------------------------------------------------------------------------------------------------------------------------------------------------------------------------------------------------------------------------------------------------------------------------------------------------------------------------------------------------------------------------------------------------------------------------------------------------------------------------------------------------------------------------------------------------------------------------------------------------------------------------------------------------------------------------------------------------------------------------------------------------------------------------------------------------------------------------------------------------------------------------------------------------------------------------------------------------------------------------------------------------------------------------------------------------------------------------------------------------------------------------------------------------------------------------------------------------------------------------------------------------------------------------------------------------------------------------------------------------------------------------------------------------------------------------------------------------------------------------------------------------------------------------------------------------------------------------------------------------------|

|  |  |  |  |  |  |                                                                                                                                                                                                                                                                                                                                                                                                                                                                                                                                                               |
|--|--|--|--|--|--|---------------------------------------------------------------------------------------------------------------------------------------------------------------------------------------------------------------------------------------------------------------------------------------------------------------------------------------------------------------------------------------------------------------------------------------------------------------------------------------------------------------------------------------------------------------|
|  |  |  |  |  |  | <p>SERA2_ARATH D-3-phosphoglycerate dehydrogenase 2, chloroplastic</p> <p>FUM1_ARATH Fumarate hydratase 1, mitochondrial</p> <p>PYRC_ARATH Dihydroorotase, mitochondrial</p> <p>GPP1_ARATH (DL)-glycerol-3-phosphatase 1, mitochondrial</p> <p>AOC4_ARATH Allene oxide cyclase 4, chloroplastic</p> <p>IMDH2_ARATH Inosine-5'-monophosphate dehydrogenase 2</p> <p>LGUC_ARATH Probable lactoylglutathione lyase, chloroplastic</p> <p>GCSP1_ARATH Glycine dehydrogenase (decarboxylating) 1, mitochondrial</p> <p>FOLD2_ARATH Bifunctional protein Fold 2</p> |
|--|--|--|--|--|--|---------------------------------------------------------------------------------------------------------------------------------------------------------------------------------------------------------------------------------------------------------------------------------------------------------------------------------------------------------------------------------------------------------------------------------------------------------------------------------------------------------------------------------------------------------------|

|            |                                                          |                           |                                                                                   |       |    |                                                                                                                                                                                                                                                                                                                                                                                                                                                                                                                                                                                                                                                                                                                                                                                                                                                                                                                                                                                                                                                                                                                                                                                                                                                                                                                                                                                                                                                                                                                                                                                                                                                                                                                                                                                                                                                                                                                                                                                                                                                                                                                                                                                                                                                                                                                                                                                            |
|------------|----------------------------------------------------------|---------------------------|-----------------------------------------------------------------------------------|-------|----|--------------------------------------------------------------------------------------------------------------------------------------------------------------------------------------------------------------------------------------------------------------------------------------------------------------------------------------------------------------------------------------------------------------------------------------------------------------------------------------------------------------------------------------------------------------------------------------------------------------------------------------------------------------------------------------------------------------------------------------------------------------------------------------------------------------------------------------------------------------------------------------------------------------------------------------------------------------------------------------------------------------------------------------------------------------------------------------------------------------------------------------------------------------------------------------------------------------------------------------------------------------------------------------------------------------------------------------------------------------------------------------------------------------------------------------------------------------------------------------------------------------------------------------------------------------------------------------------------------------------------------------------------------------------------------------------------------------------------------------------------------------------------------------------------------------------------------------------------------------------------------------------------------------------------------------------------------------------------------------------------------------------------------------------------------------------------------------------------------------------------------------------------------------------------------------------------------------------------------------------------------------------------------------------------------------------------------------------------------------------------------------------|
| GO:0034641 | cellular<br>nitrogen<br>compound<br>metabolic<br>process | GO:0006807,<br>GO:0044237 | nitrogen<br>compound<br>metabolic<br>process,<br>cellular<br>metabolic<br>process | 22.55 | 76 | SOX_ARATH Probable sarcosine oxidase<br>JAL28_ARATH Nitrile-specifier protein 1<br>UGE1_ARATH Bifunctional UDP-glucose 4-epimerase and UDP-xylose 4-epimerase 1<br>ATP5H_ARATH ATP synthase subunit d, mitochondrial<br>ATPO_ARATH ATP synthase subunit O, mitochondrial<br>SYTM1_ARATH Threonine--tRNA ligase, mitochondrial 1<br>SYHC_ARATH Histidine--tRNA ligase, cytoplasmic<br>C83B1_ARATH Cytochrome P450 83B1<br>IGMT1_ARATH Indole glucosinolate O-methyltransferase 1<br>GSHB_ARATH Glutathione synthetase, chloroplastic<br>NRL1_ARATH Nitrilase 1<br>TRPB1_ARATH Tryptophan synthase beta chain 1, chloroplastic<br>FAAH_ARATH Fatty acid amide hydrolase<br>HIS2_ARATH Histidine biosynthesis bifunctional protein hisIE, chloroplastic<br>G6PD2_ARATH Glucose-6-phosphate 1-dehydrogenase 2, chloroplastic<br>HIS4_ARATH Imidazole glycerol phosphate synthase hisHF, chloroplastic<br>PMM_ARATH Phosphomannomutase<br>KPRS5_ARATH Ribose-phosphate pyrophosphokinase 5, chloroplastic<br>PDX13_ARATH Pyridoxal 5'-phosphate synthase subunit PDX1.3<br>ATPA_ARATH ATP synthase subunit alpha, chloroplastic<br>APT3_ARATH Adenine phosphoribosyltransferase 3<br>PYRC_ARATH Dihydroorotase, mitochondrial<br>IMDH2_ARATH Inosine-5'-monophosphate dehydrogenase 2<br>FOLD2_ARATH Bifunctional protein Fold 2<br>GSTF7_ARATH Glutathione S-transferase F7<br>PCNA1_ARATH Proliferating cellular nuclear antigen 1<br>PREP1_ARATH Presequence protease 1, chloroplastic/mitochondrial<br>UEV1C_ARATH Ubiquitin-conjugating enzyme E2 variant 1C<br>RBG3_ARATH Glycine-rich RNA-binding protein 3, mitochondrial<br>RS113_ARATH 40S ribosomal protein S11-3<br>RS163_ARATH 40S ribosomal protein S16-3<br>RS161_ARATH 40S ribosomal protein S16-1<br>RS193_ARATH 40S ribosomal protein S19-3<br>RL322_ARATH 60S ribosomal protein L32-2<br>R10A3_ARATH 60S ribosomal protein L10a-3<br>RLA12_ARATH 60S acidic ribosomal protein P1-2<br>R23A1_ARATH 60S ribosomal protein L23a-1<br>EIF3E_ARATH Eukaryotic translation initiation factor 3 subunit E<br>RH15_ARATH DEAD-box ATP-dependent RNA helicase 15<br>BTF3L_ARATH Nascent polypeptide-associated complex subunit beta<br>GSTF9_ARATH Glutathione S-transferase F9<br>GSTF6_ARATH Glutathione S-transferase F6<br>UGPA1_ARATH UTP--glucose-1-phosphate uridylyltransferase 1<br>GMD1_ARATH GDP-mannose 4,6 dehydratase 1 |
|------------|----------------------------------------------------------|---------------------------|-----------------------------------------------------------------------------------|-------|----|--------------------------------------------------------------------------------------------------------------------------------------------------------------------------------------------------------------------------------------------------------------------------------------------------------------------------------------------------------------------------------------------------------------------------------------------------------------------------------------------------------------------------------------------------------------------------------------------------------------------------------------------------------------------------------------------------------------------------------------------------------------------------------------------------------------------------------------------------------------------------------------------------------------------------------------------------------------------------------------------------------------------------------------------------------------------------------------------------------------------------------------------------------------------------------------------------------------------------------------------------------------------------------------------------------------------------------------------------------------------------------------------------------------------------------------------------------------------------------------------------------------------------------------------------------------------------------------------------------------------------------------------------------------------------------------------------------------------------------------------------------------------------------------------------------------------------------------------------------------------------------------------------------------------------------------------------------------------------------------------------------------------------------------------------------------------------------------------------------------------------------------------------------------------------------------------------------------------------------------------------------------------------------------------------------------------------------------------------------------------------------------------|

|  |  |  |  |  |  |                                                                                                                                                                                                             |
|--|--|--|--|--|--|-------------------------------------------------------------------------------------------------------------------------------------------------------------------------------------------------------------|
|  |  |  |  |  |  | RMLCD_ARATH Bifunctional dTDP-4-dehydrorhamnose 3,5-epimerase/dTDP-4-dehydrorhamnose reductase<br>H2AV3_ARATH Probable histone H2A variant 3<br>MBD10_ARATH Methyl-CpG-binding domain-containing protein 10 |
|--|--|--|--|--|--|-------------------------------------------------------------------------------------------------------------------------------------------------------------------------------------------------------------|

|            |                             |            |                                   |       |    |                                                                                                                                                                                                                                                                                                                                                                                                                                                                                                                                                                                                                                                                                                                                                                                                                                                                                                                                                                                                                                                                                                                                                                                                                                                                                                                                                                                                                                                                                                                                                                                                                                                                                                                                                                                                                                                                                                                                                                                                                                                                                                                                                                                                                                                      |
|------------|-----------------------------|------------|-----------------------------------|-------|----|------------------------------------------------------------------------------------------------------------------------------------------------------------------------------------------------------------------------------------------------------------------------------------------------------------------------------------------------------------------------------------------------------------------------------------------------------------------------------------------------------------------------------------------------------------------------------------------------------------------------------------------------------------------------------------------------------------------------------------------------------------------------------------------------------------------------------------------------------------------------------------------------------------------------------------------------------------------------------------------------------------------------------------------------------------------------------------------------------------------------------------------------------------------------------------------------------------------------------------------------------------------------------------------------------------------------------------------------------------------------------------------------------------------------------------------------------------------------------------------------------------------------------------------------------------------------------------------------------------------------------------------------------------------------------------------------------------------------------------------------------------------------------------------------------------------------------------------------------------------------------------------------------------------------------------------------------------------------------------------------------------------------------------------------------------------------------------------------------------------------------------------------------------------------------------------------------------------------------------------------------|
| GO:0055114 | oxidation-reduction process | GO:0044710 | single-organism metabolic process | 66.43 | 65 | <p>SOX_ARATH Probable sarcosine oxidase</p> <p>C83B1_ARATH Cytochrome P450 83B1</p> <p>G6PD2_ARATH Glucose-6-phosphate 1-dehydrogenase 2, chloroplastic</p> <p>IMDH2_ARATH Inosine-5'-monophosphate dehydrogenase 2</p> <p>FOLD2_ARATH Bifunctional protein FOLD 2</p> <p>GSTF9_ARATH Glutathione S-transferase F9</p> <p>UGPA1_ARATH UTP--glucose-1-phosphate uridylyltransferase 1</p> <p>RMLCD_ARATH Bifunctional dTDP-4-dehydrorhamnose 3,5-epimerase/dTDP-4-dehydrorhamnose reductase</p> <p>LEU31_ARATH 3-isopropylmalate dehydrogenase 1, chloroplastic</p> <p>LEU32_ARATH 3-isopropylmalate dehydrogenase 2, chloroplastic</p> <p>LEU33_ARATH 3-isopropylmalate dehydrogenase 3, chloroplastic</p> <p>GLUT1_ARATH Glutamate synthase 1 [NADH], chloroplastic</p> <p>GCSP2_ARATH Glycine dehydrogenase (decarboxylating) 2, mitochondrial</p> <p>DCI1_ARATH Delta(3,5)-Delta(2,4)-dienoyl-CoA isomerase, peroxisomal</p> <p>THIC2_ARATH Probable acetyl-CoA acetyltransferase, cytosolic 2</p> <p>ODO2A_ARATH Dihydrolipoyllysine-residue succinyltransferase component of 2-oxoglutarate dehydrogenase complex 1, mitochondrial</p> <p>MAO1_ARATH NAD-dependent malic enzyme 1, mitochondrial</p> <p>ODO2B_ARATH Dihydrolipoyllysine-residue succinyltransferase component of 2-oxoglutarate dehydrogenase complex 2, mitochondrial</p> <p>SERA2_ARATH D-3-phosphoglycerate dehydrogenase 2, chloroplastic</p> <p>FUM1_ARATH Fumarate hydratase 1, mitochondrial</p> <p>GCSP1_ARATH Glycine dehydrogenase (decarboxylating) 1, mitochondrial</p> <p>APXS_ARATH L-ascorbate peroxidase S, chloroplastic/mitochondrial</p> <p>MSRB6_ARATH Peptide methionine sulfoxide reductase B6</p> <p>PER57_ARATH Peroxidase 57</p> <p>PER30_ARATH Peroxidase 30</p> <p>PER22_ARATH Peroxidase 22</p> <p>PER15_ARATH Peroxidase 15</p> <p>PER42_ARATH Peroxidase 42</p> <p>NDADB_ARATH NADH dehydrogenase [ubiquinone] 1 alpha subcomplex subunit 13-B</p> <p>CX6B1_ARATH Cytochrome c oxidase subunit 6b-1</p> <p>ALKR2_ARATH Probable aldo-keto reductase 2</p> <p>DHSO_ARATH Sorbitol dehydrogenase</p> <p>AL2B7_ARATH Aldehyde dehydrogenase family 2 member B7, mitochondrial</p> <p>BADH2_ARATH Betaine aldehyde dehydrogenase 2, mitochondrial</p> |
|------------|-----------------------------|------------|-----------------------------------|-------|----|------------------------------------------------------------------------------------------------------------------------------------------------------------------------------------------------------------------------------------------------------------------------------------------------------------------------------------------------------------------------------------------------------------------------------------------------------------------------------------------------------------------------------------------------------------------------------------------------------------------------------------------------------------------------------------------------------------------------------------------------------------------------------------------------------------------------------------------------------------------------------------------------------------------------------------------------------------------------------------------------------------------------------------------------------------------------------------------------------------------------------------------------------------------------------------------------------------------------------------------------------------------------------------------------------------------------------------------------------------------------------------------------------------------------------------------------------------------------------------------------------------------------------------------------------------------------------------------------------------------------------------------------------------------------------------------------------------------------------------------------------------------------------------------------------------------------------------------------------------------------------------------------------------------------------------------------------------------------------------------------------------------------------------------------------------------------------------------------------------------------------------------------------------------------------------------------------------------------------------------------------|

|            |                                      |                                                         |                                                                                                                                                                       |       |    |                                                                                                                                                                                                                                                                                                                                                                                                                                                                                                                                                                                                                                                                                                                                                                                                                                                                                                                                                                                                                                                                                                                                                                                                                                                                                                                                                                                                                                                                                                                                                                                                                                                                                                                                                                                                                                                                                                                                                                                                                                                                                                                                                                                                                                                                                                                                                                                               |
|------------|--------------------------------------|---------------------------------------------------------|-----------------------------------------------------------------------------------------------------------------------------------------------------------------------|-------|----|-----------------------------------------------------------------------------------------------------------------------------------------------------------------------------------------------------------------------------------------------------------------------------------------------------------------------------------------------------------------------------------------------------------------------------------------------------------------------------------------------------------------------------------------------------------------------------------------------------------------------------------------------------------------------------------------------------------------------------------------------------------------------------------------------------------------------------------------------------------------------------------------------------------------------------------------------------------------------------------------------------------------------------------------------------------------------------------------------------------------------------------------------------------------------------------------------------------------------------------------------------------------------------------------------------------------------------------------------------------------------------------------------------------------------------------------------------------------------------------------------------------------------------------------------------------------------------------------------------------------------------------------------------------------------------------------------------------------------------------------------------------------------------------------------------------------------------------------------------------------------------------------------------------------------------------------------------------------------------------------------------------------------------------------------------------------------------------------------------------------------------------------------------------------------------------------------------------------------------------------------------------------------------------------------------------------------------------------------------------------------------------------------|
| GO:0006082 | organic acid<br>metabolic<br>process | GO:0044281,<br>GO:0071704,<br>GO:0044237,<br>GO:0044763 | small molecule<br>metabolic<br>process,<br>organic<br>substance<br>metabolic<br>process,<br>cellular<br>metabolic<br>process, single-<br>organism<br>cellular process | 36.73 | 60 | SOX_ARATH Probable sarcosine oxidase<br>JAL28_ARATH Nitrile-specifier protein 1<br>SYTM1_ARATH Threonine--tRNA ligase, mitochondrial 1<br>SYHC_ARATH Histidine--tRNA ligase, cytoplasmic<br>C83B1_ARATH Cytochrome P450 83B1<br>IGMT1_ARATH Indole glucosinolate O-methyltransferase 1<br>GSHB_ARATH Glutathione synthetase, chloroplastic<br>NRL1_ARATH Nitrilase 1<br>TRPB1_ARATH Tryptophan synthase beta chain 1, chloroplastic<br>HIS2_ARATH Histidine biosynthesis bifunctional protein hisIE, chloroplastic<br>HIS4_ARATH Imidazole glycerol phosphate synthase hisHF, chloroplastic<br>PMM_ARATH Phosphomannomutase<br>PDX13_ARATH Pyridoxal 5'-phosphate synthase subunit PDX1.3<br>FOLD2_ARATH Bifunctional protein Fold 2<br>GLO2C_ARATH Hydroxyacylglutathione hydrolase cytoplasmic<br>LEU31_ARATH 3-isopropylmalate dehydrogenase 1, chloroplastic<br>LEU32_ARATH 3-isopropylmalate dehydrogenase 2, chloroplastic<br>LEU33_ARATH 3-isopropylmalate dehydrogenase 3, chloroplastic<br>LEUD3_ARATH 3-isopropylmalate dehydratase small subunit 3<br>APK1_ARATH Adenylyl-sulfate kinase 1, chloroplastic<br>BGL22_ARATH Beta-glucosidase 22<br>BGL21_ARATH Beta-glucosidase 21<br>GLUT1_ARATH Glutamate synthase 1 [NADH], chloroplastic<br>ILVB_ARATH Acetolactate synthase, chloroplastic<br>GCSP2_ARATH Glycine dehydrogenase (decarboxylating) 2, mitochondrial<br>PLDA1_ARATH Phospholipase D alpha 1<br>DHQS_ARATH 3-dehydroquinate synthase, chloroplastic<br>KDSA1_ARATH 2-dehydro-3-deoxyphosphooctonate aldolase 1<br>DCI1_ARATH Delta(3,5)-Delta(2,4)-dienoyl-CoA isomerase, peroxisomal<br>THIC2_ARATH Probable acetyl-CoA acetyltransferase, cytosolic 2<br>ODO2A_ARATH Dihydrolipoyllysine-residue succinyltransferase component of 2-oxoglutarate dehydrogenase complex 1, mitochondrial<br>MAO1_ARATH NAD-dependent malic enzyme 1, mitochondrial<br>ODO2B_ARATH Dihydrolipoyllysine-residue succinyltransferase component of 2-oxoglutarate dehydrogenase complex 2, mitochondrial<br>SERA2_ARATH D-3-phosphoglycerate dehydrogenase 2, chloroplastic<br>FUM1_ARATH Fumarate hydratase 1, mitochondrial<br>AOC4_ARATH Allene oxide cyclase 4, chloroplastic<br>LGUC_ARATH Probable lactoylglutathione lyase, chloroplastic<br>GCSP1_ARATH Glycine dehydrogenase (decarboxylating) 1, mitochondrial<br>MAM1_ARATH Methylthioalkylmalate synthase 1, chloroplastic |
|------------|--------------------------------------|---------------------------------------------------------|-----------------------------------------------------------------------------------------------------------------------------------------------------------------------|-------|----|-----------------------------------------------------------------------------------------------------------------------------------------------------------------------------------------------------------------------------------------------------------------------------------------------------------------------------------------------------------------------------------------------------------------------------------------------------------------------------------------------------------------------------------------------------------------------------------------------------------------------------------------------------------------------------------------------------------------------------------------------------------------------------------------------------------------------------------------------------------------------------------------------------------------------------------------------------------------------------------------------------------------------------------------------------------------------------------------------------------------------------------------------------------------------------------------------------------------------------------------------------------------------------------------------------------------------------------------------------------------------------------------------------------------------------------------------------------------------------------------------------------------------------------------------------------------------------------------------------------------------------------------------------------------------------------------------------------------------------------------------------------------------------------------------------------------------------------------------------------------------------------------------------------------------------------------------------------------------------------------------------------------------------------------------------------------------------------------------------------------------------------------------------------------------------------------------------------------------------------------------------------------------------------------------------------------------------------------------------------------------------------------------|

|            |                                  |            |                                     |       |    |                                                                                                                                                                                                                                                                                                                                                                                                                                                                                                                                                                                                                                                                                                                                                                                                                                                                                                                                                                                                                                                                                                                                                                                                                                                                                                                                                                                                                                                                                                                                                                                                                                                                                                                                                                                                                                                                                                                                                                                                                                                                                                                                                                                                                                                                                                                                                                                                                                        |
|------------|----------------------------------|------------|-------------------------------------|-------|----|----------------------------------------------------------------------------------------------------------------------------------------------------------------------------------------------------------------------------------------------------------------------------------------------------------------------------------------------------------------------------------------------------------------------------------------------------------------------------------------------------------------------------------------------------------------------------------------------------------------------------------------------------------------------------------------------------------------------------------------------------------------------------------------------------------------------------------------------------------------------------------------------------------------------------------------------------------------------------------------------------------------------------------------------------------------------------------------------------------------------------------------------------------------------------------------------------------------------------------------------------------------------------------------------------------------------------------------------------------------------------------------------------------------------------------------------------------------------------------------------------------------------------------------------------------------------------------------------------------------------------------------------------------------------------------------------------------------------------------------------------------------------------------------------------------------------------------------------------------------------------------------------------------------------------------------------------------------------------------------------------------------------------------------------------------------------------------------------------------------------------------------------------------------------------------------------------------------------------------------------------------------------------------------------------------------------------------------------------------------------------------------------------------------------------------------|
| GO:0043170 | macromolecular metabolic process | GO:0071704 | organic substance metabolic process | 28.04 | 59 | <p>           UGE1_ARATH Bifunctional UDP-glucose 4-epimerase and UDP-xylose 4-epimerase 1<br/>           UGPA1_ARATH UTP--glucose-1-phosphate uridylyltransferase 1<br/>           MSRB6_ARATH Peptide methionine sulfoxide reductase B6<br/>           PCNA1_ARATH Proliferating cellular nuclear antigen 1<br/>           VPS29_ARATH Vacuolar protein sorting-associated protein 29<br/>           CLPP4_ARATH ATP-dependent Clp protease proteolytic subunit 4, chloroplastic<br/>           CLPP2_ARATH ATP-dependent Clp protease proteolytic subunit 2, mitochondrial<br/>           PREP1_ARATH Presequence protease 1, chloroplastic/mitochondrial<br/>           SBT17_ARATH Subtilisin-like protease SBT1.7<br/>           MAP22_ARATH Methionine aminopeptidase 2B<br/>           XCP2_ARATH Cysteine protease XCP2<br/>           TPPII_ARATH Tripeptidyl-peptidase 2<br/>           UEV1C_ARATH Ubiquitin-conjugating enzyme E2 variant 1C<br/>           PRS6B_ARATH 26S proteasome regulatory subunit 6B homolog<br/>           PS12A_ARATH 26S proteasome non-ATPase regulatory subunit 12 homolog A<br/>           CP20A_ARATH Peptidyl-prolyl cis-trans isomerase CYP20-1<br/>           RBG3_ARATH Glycine-rich RNA-binding protein 3, mitochondrial<br/>           RS113_ARATH 40S ribosomal protein S11-3<br/>           RS163_ARATH 40S ribosomal protein S16-3<br/>           RS161_ARATH 40S ribosomal protein S16-1<br/>           RS193_ARATH 40S ribosomal protein S19-3<br/>           RL322_ARATH 60S ribosomal protein L32-2<br/>           R10A3_ARATH 60S ribosomal protein L10a-3<br/>           RLA12_ARATH 60S acidic ribosomal protein P1-2<br/>           R23A1_ARATH 60S ribosomal protein L23a-1<br/>           EIF3E_ARATH Eukaryotic translation initiation factor 3 subunit E<br/>           SYTM1_ARATH Threonine--tRNA ligase, mitochondrial 1<br/>           SYHC_ARATH Histidine--tRNA ligase, cytoplasmic<br/>           RH15_ARATH DEAD-box ATP-dependent RNA helicase 15<br/>           BTF3L_ARATH Nascent polypeptide-associated complex subunit beta<br/>           PMM_ARATH Phosphomannomutase<br/>           KDSA1_ARATH 2-dehydro-3-deoxyphosphooctonate aldolase 1<br/>           H2AV3_ARATH Probable histone H2A variant 3<br/>           FOLD2_ARATH Bifunctional protein Fold 2<br/>           MBD10_ARATH Methyl-CpG-binding domain-containing protein 10         </p> |
|------------|----------------------------------|------------|-------------------------------------|-------|----|----------------------------------------------------------------------------------------------------------------------------------------------------------------------------------------------------------------------------------------------------------------------------------------------------------------------------------------------------------------------------------------------------------------------------------------------------------------------------------------------------------------------------------------------------------------------------------------------------------------------------------------------------------------------------------------------------------------------------------------------------------------------------------------------------------------------------------------------------------------------------------------------------------------------------------------------------------------------------------------------------------------------------------------------------------------------------------------------------------------------------------------------------------------------------------------------------------------------------------------------------------------------------------------------------------------------------------------------------------------------------------------------------------------------------------------------------------------------------------------------------------------------------------------------------------------------------------------------------------------------------------------------------------------------------------------------------------------------------------------------------------------------------------------------------------------------------------------------------------------------------------------------------------------------------------------------------------------------------------------------------------------------------------------------------------------------------------------------------------------------------------------------------------------------------------------------------------------------------------------------------------------------------------------------------------------------------------------------------------------------------------------------------------------------------------------|

|            |                                           |            |                                     |       |    |                                                                                                                                                                                                                                                                                                                                                                                                                                                                                                                                                                                                                                                                                                                                                                                                                                                                                                                                                                                                                                                                                                                                                                                                                                                                                                                                                                                                                                                                                                                                                                                                                                                                                                                                                                                                                                                                                                                                                                                                                                                                                                                                                                                                                                                                                                                                                                                                                                        |
|------------|-------------------------------------------|------------|-------------------------------------|-------|----|----------------------------------------------------------------------------------------------------------------------------------------------------------------------------------------------------------------------------------------------------------------------------------------------------------------------------------------------------------------------------------------------------------------------------------------------------------------------------------------------------------------------------------------------------------------------------------------------------------------------------------------------------------------------------------------------------------------------------------------------------------------------------------------------------------------------------------------------------------------------------------------------------------------------------------------------------------------------------------------------------------------------------------------------------------------------------------------------------------------------------------------------------------------------------------------------------------------------------------------------------------------------------------------------------------------------------------------------------------------------------------------------------------------------------------------------------------------------------------------------------------------------------------------------------------------------------------------------------------------------------------------------------------------------------------------------------------------------------------------------------------------------------------------------------------------------------------------------------------------------------------------------------------------------------------------------------------------------------------------------------------------------------------------------------------------------------------------------------------------------------------------------------------------------------------------------------------------------------------------------------------------------------------------------------------------------------------------------------------------------------------------------------------------------------------------|
| GO:1901360 | organic cyclic compound metabolic process | GO:0071704 | organic substance metabolic process | 20.14 | 54 | <p>           UGE1_ARATH Bifunctional UDP-glucose 4-epimerase and UDP-xylose 4-epimerase 1<br/>           SYTM1_ARATH Threonine--tRNA ligase, mitochondrial 1<br/>           SYHC_ARATH Histidine--tRNA ligase, cytoplasmic<br/>           PMM_ARATH Phosphomannomutase<br/>           FOLD2_ARATH Bifunctional protein Fold 2<br/>           PCNA1_ARATH Proliferating cellular nuclear antigen 1<br/>           PREP1_ARATH Presequence protease 1, chloroplastic/mitochondrial<br/>           UEV1C_ARATH Ubiquitin-conjugating enzyme E2 variant 1C<br/>           RBG3_ARATH Glycine-rich RNA-binding protein 3, mitochondrial<br/>           RS113_ARATH 40S ribosomal protein S11-3<br/>           RS163_ARATH 40S ribosomal protein S16-3<br/>           RS161_ARATH 40S ribosomal protein S16-1<br/>           RS193_ARATH 40S ribosomal protein S19-3<br/>           RL322_ARATH 60S ribosomal protein L32-2<br/>           R10A3_ARATH 60S ribosomal protein L10a-3<br/>           RLA12_ARATH 60S acidic ribosomal protein P1-2<br/>           R23A1_ARATH 60S ribosomal protein L23a-1<br/>           EIF3E_ARATH Eukaryotic translation initiation factor 3 subunit E<br/>           RH15_ARATH DEAD-box ATP-dependent RNA helicase 15<br/>           BTF3L_ARATH Nascent polypeptide-associated complex subunit beta<br/>           UGPA1_ARATH UTP--glucose-1-phosphate uridylyltransferase 1<br/>           H2AV3_ARATH Probable histone H2A variant 3<br/>           MBD10_ARATH Methyl-CpG-binding domain-containing protein 10<br/>           KDSA1_ARATH 2-dehydro-3-deoxyphosphooctonate aldolase 1<br/>           MSRB6_ARATH Peptide methionine sulfoxide reductase B6<br/>           VPS29_ARATH Vacuolar protein sorting-associated protein 29<br/>           CLPP4_ARATH ATP-dependent Clp protease proteolytic subunit 4, chloroplastic<br/>           CLPP2_ARATH ATP-dependent Clp protease proteolytic subunit 2, mitochondrial<br/>           SBT17_ARATH Subtilisin-like protease SBT1.7<br/>           MAP22_ARATH Methionine aminopeptidase 2B<br/>           XCP2_ARATH Cysteine protease XCP2<br/>           TPPII_ARATH Tripeptidyl-peptidase 2<br/>           PRS6B_ARATH 26S proteasome regulatory subunit 6B homolog<br/>           PS12A_ARATH 26S proteasome non-ATPase regulatory subunit 12 homolog A<br/>           CP20A_ARATH Peptidyl-prolyl cis-trans isomerase CYP20-1         </p> |
|------------|-------------------------------------------|------------|-------------------------------------|-------|----|----------------------------------------------------------------------------------------------------------------------------------------------------------------------------------------------------------------------------------------------------------------------------------------------------------------------------------------------------------------------------------------------------------------------------------------------------------------------------------------------------------------------------------------------------------------------------------------------------------------------------------------------------------------------------------------------------------------------------------------------------------------------------------------------------------------------------------------------------------------------------------------------------------------------------------------------------------------------------------------------------------------------------------------------------------------------------------------------------------------------------------------------------------------------------------------------------------------------------------------------------------------------------------------------------------------------------------------------------------------------------------------------------------------------------------------------------------------------------------------------------------------------------------------------------------------------------------------------------------------------------------------------------------------------------------------------------------------------------------------------------------------------------------------------------------------------------------------------------------------------------------------------------------------------------------------------------------------------------------------------------------------------------------------------------------------------------------------------------------------------------------------------------------------------------------------------------------------------------------------------------------------------------------------------------------------------------------------------------------------------------------------------------------------------------------------|

|            |                                              |            |                            |       |    |                                                                                                                                                                                                                                                                                                                                                                                                                                                                                                                                                                                                                                                                                                                                                                                                                                                                                                                                                                                                                                                                                                                                                                                                                                                                                                                                                                                                                                                                                                                                                                                                                                                                                                                                                                                                                                                                                                                                                                                                                                                                                                                  |
|------------|----------------------------------------------|------------|----------------------------|-------|----|------------------------------------------------------------------------------------------------------------------------------------------------------------------------------------------------------------------------------------------------------------------------------------------------------------------------------------------------------------------------------------------------------------------------------------------------------------------------------------------------------------------------------------------------------------------------------------------------------------------------------------------------------------------------------------------------------------------------------------------------------------------------------------------------------------------------------------------------------------------------------------------------------------------------------------------------------------------------------------------------------------------------------------------------------------------------------------------------------------------------------------------------------------------------------------------------------------------------------------------------------------------------------------------------------------------------------------------------------------------------------------------------------------------------------------------------------------------------------------------------------------------------------------------------------------------------------------------------------------------------------------------------------------------------------------------------------------------------------------------------------------------------------------------------------------------------------------------------------------------------------------------------------------------------------------------------------------------------------------------------------------------------------------------------------------------------------------------------------------------|
| GO:0006725 | cellular aromatic compound metabolic process | GO:0044237 | cellular metabolic process | 42.58 | 54 | <p>SOX_ARATH Probable sarcosine oxidase</p> <p>UGE1_ARATH Bifunctional UDP-glucose 4-epimerase and UDP-xylose 4-epimerase 1</p> <p>ATP5H_ARATH ATP synthase subunit d, mitochondrial</p> <p>ATPO_ARATH ATP synthase subunit O, mitochondrial</p> <p>SYTM1_ARATH Threonine--tRNA ligase, mitochondrial 1</p> <p>SYHC_ARATH Histidine--tRNA ligase, cytoplasmic</p> <p>C83B1_ARATH Cytochrome P450 83B1</p> <p>IGMT1_ARATH Indole glucosinolate O-methyltransferase 1</p> <p>NRL1_ARATH Nitrilase 1</p> <p>TRPB1_ARATH Tryptophan synthase beta chain 1, chloroplastic</p> <p>HIS2_ARATH Histidine biosynthesis bifunctional protein hisIE, chloroplastic</p> <p>G6PD2_ARATH Glucose-6-phosphate 1-dehydrogenase 2, chloroplastic</p> <p>HIS4_ARATH Imidazole glycerol phosphate synthase hisHF, chloroplastic</p> <p>PMM_ARATH Phosphomannomutase</p> <p>KPRS5_ARATH Ribose-phosphate pyrophosphokinase 5, chloroplastic</p> <p>PDX13_ARATH Pyridoxal 5'-phosphate synthase subunit PDX1.3</p> <p>ATPA_ARATH ATP synthase subunit alpha, chloroplastic</p> <p>APT3_ARATH Adenine phosphoribosyltransferase 3</p> <p>PYRC_ARATH Dihydroorotase, mitochondrial</p> <p>IMDH2_ARATH Inosine-5'-monophosphate dehydrogenase 2</p> <p>FOLD2_ARATH Bifunctional protein FoLD 2</p> <p>PCNA1_ARATH Proliferating cellular nuclear antigen 1</p> <p>PREP1_ARATH Presequence protease 1, chloroplastic/mitochondrial</p> <p>UEV1C_ARATH Ubiquitin-conjugating enzyme E2 variant 1C</p> <p>RBG3_ARATH Glycine-rich RNA-binding protein 3, mitochondrial</p> <p>EIF3E_ARATH Eukaryotic translation initiation factor 3 subunit E</p> <p>RH15_ARATH DEAD-box ATP-dependent RNA helicase 15</p> <p>BTF3L_ARATH Nascent polypeptide-associated complex subunit beta</p> <p>GMD1_ARATH GDP-mannose 4,6 dehydratase 1</p> <p>RMLCD_ARATH Bifunctional dTDP-4-dehydrorhamnose 3,5-epimerase/dTDP-4-dehydrorhamnose reductase</p> <p>H2AV3_ARATH Probable histone H2A variant 3</p> <p>MBD10_ARATH Methyl-CpG-binding domain-containing protein 10</p> <p>BGL21_ARATH Beta-glucosidase 21</p> <p>DIR13_ARATH Dirigent protein 13</p> |
|------------|----------------------------------------------|------------|----------------------------|-------|----|------------------------------------------------------------------------------------------------------------------------------------------------------------------------------------------------------------------------------------------------------------------------------------------------------------------------------------------------------------------------------------------------------------------------------------------------------------------------------------------------------------------------------------------------------------------------------------------------------------------------------------------------------------------------------------------------------------------------------------------------------------------------------------------------------------------------------------------------------------------------------------------------------------------------------------------------------------------------------------------------------------------------------------------------------------------------------------------------------------------------------------------------------------------------------------------------------------------------------------------------------------------------------------------------------------------------------------------------------------------------------------------------------------------------------------------------------------------------------------------------------------------------------------------------------------------------------------------------------------------------------------------------------------------------------------------------------------------------------------------------------------------------------------------------------------------------------------------------------------------------------------------------------------------------------------------------------------------------------------------------------------------------------------------------------------------------------------------------------------------|

|            |                               |            |                            |       |    |                                                                                                                                                                                                                                                                                                                                                                                                                                                                                                                                                                                                                                                                                                                                                                                                                                                                                                                                                                                                                                                                                                                                                                                                                                                                                                                                                                                                                                                                                                                                                                                                                                                                                                                                                                                                                                                                                                                                                                                                                                                                                                                                             |
|------------|-------------------------------|------------|----------------------------|-------|----|---------------------------------------------------------------------------------------------------------------------------------------------------------------------------------------------------------------------------------------------------------------------------------------------------------------------------------------------------------------------------------------------------------------------------------------------------------------------------------------------------------------------------------------------------------------------------------------------------------------------------------------------------------------------------------------------------------------------------------------------------------------------------------------------------------------------------------------------------------------------------------------------------------------------------------------------------------------------------------------------------------------------------------------------------------------------------------------------------------------------------------------------------------------------------------------------------------------------------------------------------------------------------------------------------------------------------------------------------------------------------------------------------------------------------------------------------------------------------------------------------------------------------------------------------------------------------------------------------------------------------------------------------------------------------------------------------------------------------------------------------------------------------------------------------------------------------------------------------------------------------------------------------------------------------------------------------------------------------------------------------------------------------------------------------------------------------------------------------------------------------------------------|
| GO:0046483 | heterocycle metabolic process | GO:0044237 | cellular metabolic process | 18.46 | 52 | <p>SOX_ARATH Probable sarcosine oxidase</p> <p>UGE1_ARATH Bifunctional UDP-glucose 4-epimerase and UDP-xylose 4-epimerase 1</p> <p>ATP5H_ARATH ATP synthase subunit d, mitochondrial</p> <p>ATPO_ARATH ATP synthase subunit O, mitochondrial</p> <p>SYTM1_ARATH Threonine--tRNA ligase, mitochondrial 1</p> <p>SYHC_ARATH Histidine--tRNA ligase, cytoplasmic</p> <p>C83B1_ARATH Cytochrome P450 83B1</p> <p>IGMT1_ARATH Indole glucosinolate O-methyltransferase 1</p> <p>NRL1_ARATH Nitrilase 1</p> <p>TRPB1_ARATH Tryptophan synthase beta chain 1, chloroplastic</p> <p>HIS2_ARATH Histidine biosynthesis bifunctional protein hisIE, chloroplastic</p> <p>G6PD2_ARATH Glucose-6-phosphate 1-dehydrogenase 2, chloroplastic</p> <p>HIS4_ARATH Imidazole glycerol phosphate synthase hisHF, chloroplastic</p> <p>PMM_ARATH Phosphomannomutase</p> <p>KPRS5_ARATH Ribose-phosphate pyrophosphokinase 5, chloroplastic</p> <p>PDX13_ARATH Pyridoxal 5'-phosphate synthase subunit PDX1.3</p> <p>ATPA_ARATH ATP synthase subunit alpha, chloroplastic</p> <p>APT3_ARATH Adenine phosphoribosyltransferase 3</p> <p>PYRC_ARATH Dihydroorotase, mitochondrial</p> <p>IMDH2_ARATH Inosine-5'-monophosphate dehydrogenase 2</p> <p>FOLD2_ARATH Bifunctional protein FoLD 2</p> <p>PCNA1_ARATH Proliferating cellular nuclear antigen 1</p> <p>PREP1_ARATH Presequence protease 1, chloroplastic/mitochondrial</p> <p>UEV1C_ARATH Ubiquitin-conjugating enzyme E2 variant 1C</p> <p>RBG3_ARATH Glycine-rich RNA-binding protein 3, mitochondrial</p> <p>EIF3E_ARATH Eukaryotic translation initiation factor 3 subunit E</p> <p>RH15_ARATH DEAD-box ATP-dependent RNA helicase 15</p> <p>BTF3L_ARATH Nascent polypeptide-associated complex subunit beta</p> <p>UGPA1_ARATH UTP--glucose-1-phosphate uridylyltransferase 1</p> <p>GMD1_ARATH GDP-mannose 4,6 dehydratase 1</p> <p>RMLCD_ARATH Bifunctional dTDP-4-dehydrorhamnose 3,5-epimerase/dTDP-4-dehydrorhamnose reductase</p> <p>H2AV3_ARATH Probable histone H2A variant 3</p> <p>MBD10_ARATH Methyl-CpG-binding domain-containing protein 10</p> <p>BGL21_ARATH Beta-glucosidase 21</p> |
|------------|-------------------------------|------------|----------------------------|-------|----|---------------------------------------------------------------------------------------------------------------------------------------------------------------------------------------------------------------------------------------------------------------------------------------------------------------------------------------------------------------------------------------------------------------------------------------------------------------------------------------------------------------------------------------------------------------------------------------------------------------------------------------------------------------------------------------------------------------------------------------------------------------------------------------------------------------------------------------------------------------------------------------------------------------------------------------------------------------------------------------------------------------------------------------------------------------------------------------------------------------------------------------------------------------------------------------------------------------------------------------------------------------------------------------------------------------------------------------------------------------------------------------------------------------------------------------------------------------------------------------------------------------------------------------------------------------------------------------------------------------------------------------------------------------------------------------------------------------------------------------------------------------------------------------------------------------------------------------------------------------------------------------------------------------------------------------------------------------------------------------------------------------------------------------------------------------------------------------------------------------------------------------------|

|            |                                      |                        |                                                         |       |    |                                                                                                                                                                                                                                                                                                                                                                                                                                                                                                                                                                                                                                                                                                                                                                                                                                                                                                                                                                                                                                                                                                                                                                                                                                                                                                                                                                                                                                                                                                                                                                                                                                                                                                                                                                                                                                                                                                                                                                                                                                                                                                                                                                                                                                                                |
|------------|--------------------------------------|------------------------|---------------------------------------------------------|-------|----|----------------------------------------------------------------------------------------------------------------------------------------------------------------------------------------------------------------------------------------------------------------------------------------------------------------------------------------------------------------------------------------------------------------------------------------------------------------------------------------------------------------------------------------------------------------------------------------------------------------------------------------------------------------------------------------------------------------------------------------------------------------------------------------------------------------------------------------------------------------------------------------------------------------------------------------------------------------------------------------------------------------------------------------------------------------------------------------------------------------------------------------------------------------------------------------------------------------------------------------------------------------------------------------------------------------------------------------------------------------------------------------------------------------------------------------------------------------------------------------------------------------------------------------------------------------------------------------------------------------------------------------------------------------------------------------------------------------------------------------------------------------------------------------------------------------------------------------------------------------------------------------------------------------------------------------------------------------------------------------------------------------------------------------------------------------------------------------------------------------------------------------------------------------------------------------------------------------------------------------------------------------|
| GO:0044711 | single-organism biosynthetic process | GO:0009058, GO:0044710 | biosynthetic process, single-organism metabolic process | 16.63 | 51 | <p>           UGE1_ARATH Bifunctional UDP-glucose 4-epimerase and UDP-xylose 4-epimerase 1<br/>           ATP5H_ARATH ATP synthase subunit d, mitochondrial<br/>           ATPO_ARATH ATP synthase subunit O, mitochondrial<br/>           C83B1_ARATH Cytochrome P450 83B1<br/>           NRL1_ARATH Nitrilase 1<br/>           TRPB1_ARATH Tryptophan synthase beta chain 1, chloroplastic<br/>           HIS2_ARATH Histidine biosynthesis bifunctional protein hisIE, chloroplastic<br/>           HIS4_ARATH Imidazole glycerol phosphate synthase hisHF, chloroplastic<br/>           PMM_ARATH Phosphomannomutase<br/>           KPRS5_ARATH Ribose-phosphate pyrophosphokinase 5, chloroplastic<br/>           PDX13_ARATH Pyridoxal 5'-phosphate synthase subunit PDX1.3<br/>           ATPA_ARATH ATP synthase subunit alpha, chloroplastic<br/>           APT3_ARATH Adenine phosphoribosyltransferase 3<br/>           PYRC_ARATH Dihydroorotase, mitochondrial<br/>           IMDH2_ARATH Inosine-5'-monophosphate dehydrogenase 2<br/>           FOLD2_ARATH Bifunctional protein Fold 2<br/>           ITPK1_ARATH Inositol-tetrakisphosphate 1-kinase 1<br/>           LEU31_ARATH 3-isopropylmalate dehydrogenase 1, chloroplastic<br/>           LEU32_ARATH 3-isopropylmalate dehydrogenase 2, chloroplastic<br/>           LEU33_ARATH 3-isopropylmalate dehydrogenase 3, chloroplastic<br/>           LEUD3_ARATH 3-isopropylmalate dehydratase small subunit 3<br/>           APK1_ARATH Adenylyl-sulfate kinase 1, chloroplastic<br/>           GLUT1_ARATH Glutamate synthase 1 [NADH], chloroplastic<br/>           GPP2_ARATH (DL)-glycerol-3-phosphatase 2<br/>           ILVB_ARATH Acetolactate synthase, chloroplastic<br/>           DHQS_ARATH 3-dehydroquinate synthase, chloroplastic<br/>           KDSA1_ARATH 2-dehydro-3-deoxyphosphooctonate aldolase 1<br/>           SERA2_ARATH D-3-phosphoglycerate dehydrogenase 2, chloroplastic<br/>           GPP1_ARATH (DL)-glycerol-3-phosphatase 1, mitochondrial<br/>           AOC4_ARATH Allene oxide cyclase 4, chloroplastic<br/>           DIR13_ARATH Dirigent protein 13<br/>           MAM1_ARATH Methylthioalkylmalate synthase 1, chloroplastic<sup>7</sup> </p> |
|------------|--------------------------------------|------------------------|---------------------------------------------------------|-------|----|----------------------------------------------------------------------------------------------------------------------------------------------------------------------------------------------------------------------------------------------------------------------------------------------------------------------------------------------------------------------------------------------------------------------------------------------------------------------------------------------------------------------------------------------------------------------------------------------------------------------------------------------------------------------------------------------------------------------------------------------------------------------------------------------------------------------------------------------------------------------------------------------------------------------------------------------------------------------------------------------------------------------------------------------------------------------------------------------------------------------------------------------------------------------------------------------------------------------------------------------------------------------------------------------------------------------------------------------------------------------------------------------------------------------------------------------------------------------------------------------------------------------------------------------------------------------------------------------------------------------------------------------------------------------------------------------------------------------------------------------------------------------------------------------------------------------------------------------------------------------------------------------------------------------------------------------------------------------------------------------------------------------------------------------------------------------------------------------------------------------------------------------------------------------------------------------------------------------------------------------------------------|

|            |                                 |                           |                                                                           |       |    |                                                                                                                                                                                                                                                                                                                                                                                                                                                                                                                                                                                                                                                                                                                                                                                                                                                                                                                                                                                                                                                                                                                                                                                                                                                                                                      |
|------------|---------------------------------|---------------------------|---------------------------------------------------------------------------|-------|----|------------------------------------------------------------------------------------------------------------------------------------------------------------------------------------------------------------------------------------------------------------------------------------------------------------------------------------------------------------------------------------------------------------------------------------------------------------------------------------------------------------------------------------------------------------------------------------------------------------------------------------------------------------------------------------------------------------------------------------------------------------------------------------------------------------------------------------------------------------------------------------------------------------------------------------------------------------------------------------------------------------------------------------------------------------------------------------------------------------------------------------------------------------------------------------------------------------------------------------------------------------------------------------------------------|
| GO:0019538 | protein<br>metabolic<br>process | GO:0044238,<br>GO:0043170 | primary<br>metabolic<br>process,<br>macromolecule<br>metabolic<br>process | 27.64 | 47 | SYTM1_ARATH Threonine--tRNA ligase, mitochondrial 1<br>SYHC_ARATH Histidine--tRNA ligase, cytoplasmic<br>PMM_ARATH Phosphomannomutase<br>PREP1_ARATH Presequence protease 1, chloroplastic/mitochondrial<br>UEV1C_ARATH Ubiquitin-conjugating enzyme E2 variant 1C<br>RS113_ARATH 40S ribosomal protein S11-3<br>RS163_ARATH 40S ribosomal protein S16-3<br>RS161_ARATH 40S ribosomal protein S16-1<br>RS193_ARATH 40S ribosomal protein S19-3<br>RL322_ARATH 60S ribosomal protein L32-2<br>R10A3_ARATH 60S ribosomal protein L10a-3<br>RLA12_ARATH 60S acidic ribosomal protein P1-2<br>R23A1_ARATH 60S ribosomal protein L23a-1<br>EIF3E_ARATH Eukaryotic translation initiation factor 3 subunit E<br>MSRB6_ARATH Peptide methionine sulfoxide reductase B6<br>CLPP4_ARATH ATP-dependent Clp protease proteolytic subunit 4, chloroplastic<br>CLPP2_ARATH ATP-dependent Clp protease proteolytic subunit 2, mitochondrial<br>SBT17_ARATH Subtilisin-like protease SBT1.7<br>MAP22_ARATH Methionine aminopeptidase 2B<br>XCP2_ARATH Cysteine protease XCP2<br>TPPII_ARATH Tripeptidyl-peptidase 2<br>PRS6B_ARATH 26S proteasome regulatory subunit 6B homolog<br>PS12A_ARATH 26S proteasome non-ATPase regulatory subunit 12 homolog A<br>CP20A_ARATH Peptidyl-prolyl cis-trans isomerase CYP20-1 |
|------------|---------------------------------|---------------------------|---------------------------------------------------------------------------|-------|----|------------------------------------------------------------------------------------------------------------------------------------------------------------------------------------------------------------------------------------------------------------------------------------------------------------------------------------------------------------------------------------------------------------------------------------------------------------------------------------------------------------------------------------------------------------------------------------------------------------------------------------------------------------------------------------------------------------------------------------------------------------------------------------------------------------------------------------------------------------------------------------------------------------------------------------------------------------------------------------------------------------------------------------------------------------------------------------------------------------------------------------------------------------------------------------------------------------------------------------------------------------------------------------------------------|

|            |                                                |                           |                                                                            |       |    |                                                                                                                                                                                                                                                                                                                                                                                                                                                                                                                                                                                                                                                                                                                                                                                                                                                                                                                                                                                                                                                                                                                                                                                                                                                                                                                                                                                                                                                                                                                                                                                                                                                                                                                                                                                                                |
|------------|------------------------------------------------|---------------------------|----------------------------------------------------------------------------|-------|----|----------------------------------------------------------------------------------------------------------------------------------------------------------------------------------------------------------------------------------------------------------------------------------------------------------------------------------------------------------------------------------------------------------------------------------------------------------------------------------------------------------------------------------------------------------------------------------------------------------------------------------------------------------------------------------------------------------------------------------------------------------------------------------------------------------------------------------------------------------------------------------------------------------------------------------------------------------------------------------------------------------------------------------------------------------------------------------------------------------------------------------------------------------------------------------------------------------------------------------------------------------------------------------------------------------------------------------------------------------------------------------------------------------------------------------------------------------------------------------------------------------------------------------------------------------------------------------------------------------------------------------------------------------------------------------------------------------------------------------------------------------------------------------------------------------------|
| GO:0044260 | cellular<br>macromolecule metabolic<br>process | GO:0043170,<br>GO:0044237 | macromolecule<br>metabolic<br>process,<br>cellular<br>metabolic<br>process | 18.37 | 45 | <p>UGE1_ARATH Bifunctional UDP-glucose 4-epimerase and UDP-xylose 4-epimerase 1</p> <p>SYTM1_ARATH Threonine--tRNA ligase, mitochondrial 1</p> <p>SYHC_ARATH Histidine--tRNA ligase, cytoplasmic</p> <p>PMM_ARATH Phosphomannomutase</p> <p>FOLD2_ARATH Bifunctional protein Fold 2</p> <p>PCNA1_ARATH Proliferating cellular nuclear antigen 1</p> <p>PREP1_ARATH Presequence protease 1, chloroplastic/mitochondrial</p> <p>UEV1C_ARATH Ubiquitin-conjugating enzyme E2 variant 1C</p> <p>RBG3_ARATH Glycine-rich RNA-binding protein 3, mitochondrial</p> <p>RS113_ARATH 40S ribosomal protein S11-3</p> <p>RS163_ARATH 40S ribosomal protein S16-3</p> <p>RS161_ARATH 40S ribosomal protein S16-1</p> <p>RS193_ARATH 40S ribosomal protein S19-3</p> <p>RL322_ARATH 60S ribosomal protein L32-2</p> <p>R10A3_ARATH 60S ribosomal protein L10a-3</p> <p>RLA12_ARATH 60S acidic ribosomal protein P1-2</p> <p>R23A1_ARATH 60S ribosomal protein L23a-1</p> <p>EIF3E_ARATH Eukaryotic translation initiation factor 3 subunit E</p> <p>RH15_ARATH DEAD-box ATP-dependent RNA helicase 15</p> <p>BTF3L_ARATH Nascent polypeptide-associated complex subunit beta</p> <p>UGPA1_ARATH UTP--glucose-1-phosphate uridylyltransferase 1</p> <p>H2AV3_ARATH Probable histone H2A variant 3</p> <p>MBD10_ARATH Methyl-CpG-binding domain-containing protein 10</p> <p>KDSA1_ARATH 2-dehydro-3-deoxyphosphooctonate aldolase 1</p> <p>MSRB6_ARATH Peptide methionine sulfoxide reductase B6</p> <p>VPS29_ARATH Vacuolar protein sorting-associated protein 29</p> <p>XCP2_ARATH Cysteine protease XCP2</p> <p>PRS6B_ARATH 26S proteasome regulatory subunit 6B homolog</p> <p>PS12A_ARATH 26S proteasome non-ATPase regulatory subunit 12 homolog A</p> <p>CP20A_ARATH Peptidyl-prolyl cis-trans isomerase CYP20-1</p> |
|------------|------------------------------------------------|---------------------------|----------------------------------------------------------------------------|-------|----|----------------------------------------------------------------------------------------------------------------------------------------------------------------------------------------------------------------------------------------------------------------------------------------------------------------------------------------------------------------------------------------------------------------------------------------------------------------------------------------------------------------------------------------------------------------------------------------------------------------------------------------------------------------------------------------------------------------------------------------------------------------------------------------------------------------------------------------------------------------------------------------------------------------------------------------------------------------------------------------------------------------------------------------------------------------------------------------------------------------------------------------------------------------------------------------------------------------------------------------------------------------------------------------------------------------------------------------------------------------------------------------------------------------------------------------------------------------------------------------------------------------------------------------------------------------------------------------------------------------------------------------------------------------------------------------------------------------------------------------------------------------------------------------------------------------|

|            |           |            |                               |       |    |                                                                                                                                                                                                                                                                                                                                                                                                                                                                                                                                                                                                                                                                                                                                                                                                                                                                                                                                                                                                                                                                                                                                                                                                                                                                                                                                                                                                                                                                                                                                                             |
|------------|-----------|------------|-------------------------------|-------|----|-------------------------------------------------------------------------------------------------------------------------------------------------------------------------------------------------------------------------------------------------------------------------------------------------------------------------------------------------------------------------------------------------------------------------------------------------------------------------------------------------------------------------------------------------------------------------------------------------------------------------------------------------------------------------------------------------------------------------------------------------------------------------------------------------------------------------------------------------------------------------------------------------------------------------------------------------------------------------------------------------------------------------------------------------------------------------------------------------------------------------------------------------------------------------------------------------------------------------------------------------------------------------------------------------------------------------------------------------------------------------------------------------------------------------------------------------------------------------------------------------------------------------------------------------------------|
| GO:0006810 | transport | GO:0051234 | establishment of localization | 91.48 | 42 | <p>ATP5H_ARATH ATP synthase subunit d, mitochondrial</p> <p>ATPO_ARATH ATP synthase subunit O, mitochondrial</p> <p>PMM_ARATH Phosphomannomutase</p> <p>ATPA_ARATH ATP synthase subunit alpha, chloroplastic</p> <p>RH15_ARATH DEAD-box ATP-dependent RNA helicase 15</p> <p>PIP12_ARATH Aquaporin PIP1-2</p> <p>PIP21_ARATH Aquaporin PIP2-1</p> <p>VATD_ARATH V-type proton ATPase subunit D</p> <p>VA0D2_ARATH V-type proton ATPase subunit d2</p> <p>SC13A_ARATH Protein transport protein SEC13 homolog A</p> <p>VAP12_ARATH Vesicle-associated protein 1-2</p> <p>SNAA2_ARATH Alpha-soluble NSF attachment protein 2</p> <p>VPS29_ARATH Vacuolar protein sorting-associated protein 29</p> <p>HLB1_ARATH Protein HLB1</p> <p>SYP32_ARATH Syntaxin-32</p> <p>SYT1_ARATH Synaptotagmin-1</p> <p>PATL4_ARATH Patellin-4</p> <p>TI232_ARATH Mitochondrial import inner membrane translocase subunit TIM23-2</p> <p>TIM13_ARATH Mitochondrial import inner membrane translocase subunit TIM13</p> <p>PUMP1_ARATH Mitochondrial uncoupling protein 1</p> <p>ADT2_ARATH ADP,ATP carrier protein 2, mitochondrial</p> <p>HS905_ARATH Heat shock protein 90-5, chloroplastic</p> <p>AB1F_ARATH ABC transporter F family member 1</p> <p>NACA1_ARATH Nascent polypeptide-associated complex subunit alpha-like protein 1</p> <p>NACA3_ARATH Nascent polypeptide-associated complex subunit alpha-like protein 3</p> <p>IMPA6_ARATH Importin subunit alpha-6</p> <p>RAGP1_ARATH RAN GTPase-activating protein 1</p> <p>BIG_ARATH Auxin transport protein BIG</p> |
|------------|-----------|------------|-------------------------------|-------|----|-------------------------------------------------------------------------------------------------------------------------------------------------------------------------------------------------------------------------------------------------------------------------------------------------------------------------------------------------------------------------------------------------------------------------------------------------------------------------------------------------------------------------------------------------------------------------------------------------------------------------------------------------------------------------------------------------------------------------------------------------------------------------------------------------------------------------------------------------------------------------------------------------------------------------------------------------------------------------------------------------------------------------------------------------------------------------------------------------------------------------------------------------------------------------------------------------------------------------------------------------------------------------------------------------------------------------------------------------------------------------------------------------------------------------------------------------------------------------------------------------------------------------------------------------------------|

|            |                                                  |                                                            |                                                                                                                                                                                                 |       |    |                                                                                                                                                                                                                                                                                                                                                                                                                                                                                                                                                                                                                                                                                                                                                                                                                                                                                                                                                                                                                                                                                                                                                                                                                                                                                                                                                                                                                                                                                                                                                                                                                 |
|------------|--------------------------------------------------|------------------------------------------------------------|-------------------------------------------------------------------------------------------------------------------------------------------------------------------------------------------------|-------|----|-----------------------------------------------------------------------------------------------------------------------------------------------------------------------------------------------------------------------------------------------------------------------------------------------------------------------------------------------------------------------------------------------------------------------------------------------------------------------------------------------------------------------------------------------------------------------------------------------------------------------------------------------------------------------------------------------------------------------------------------------------------------------------------------------------------------------------------------------------------------------------------------------------------------------------------------------------------------------------------------------------------------------------------------------------------------------------------------------------------------------------------------------------------------------------------------------------------------------------------------------------------------------------------------------------------------------------------------------------------------------------------------------------------------------------------------------------------------------------------------------------------------------------------------------------------------------------------------------------------------|
| GO:0006139 | nucleobase-containing compound metabolic process | GO:0044238, GO:0034641, GO:0046483, GO:0006725, GO:1901360 | primary metabolic process, cellular nitrogen compound metabolic process, heterocycle metabolic process, cellular aromatic compound metabolic process, organic cyclic compound metabolic process | 17.25 | 38 | <p>UGE1_ARATH Bifunctional UDP-glucose 4-epimerase and UDP-xylose 4-epimerase 1</p> <p>ATP5H_ARATH ATP synthase subunit d, mitochondrial</p> <p>ATPO_ARATH ATP synthase subunit O, mitochondrial</p> <p>SYTM1_ARATH Threonine--tRNA ligase, mitochondrial 1</p> <p>SYHC_ARATH Histidine--tRNA ligase, cytoplasmic</p> <p>G6PD2_ARATH Glucose-6-phosphate 1-dehydrogenase 2, chloroplastic</p> <p>PMM_ARATH Phosphomannomutase</p> <p>KPRS5_ARATH Ribose-phosphate pyrophosphokinase 5, chloroplastic</p> <p>ATPA_ARATH ATP synthase subunit alpha, chloroplastic</p> <p>APT3_ARATH Adenine phosphoribosyltransferase 3</p> <p>PYRC_ARATH Dihydroorotase, mitochondrial</p> <p>IMDH2_ARATH Inosine-5'-monophosphate dehydrogenase 2</p> <p>FOLD2_ARATH Bifunctional protein Fold 2</p> <p>PCNA1_ARATH Proliferating cellular nuclear antigen 1</p> <p>PREP1_ARATH Presequence protease 1, chloroplastic/mitochondrial</p> <p>UEV1C_ARATH Ubiquitin-conjugating enzyme E2 variant 1C</p> <p>RBG3_ARATH Glycine-rich RNA-binding protein 3, mitochondrial</p> <p>EIF3E_ARATH Eukaryotic translation initiation factor 3 subunit E</p> <p>RH15_ARATH DEAD-box ATP-dependent RNA helicase 15</p> <p>BTF3L_ARATH Nascent polypeptide-associated complex subunit beta</p> <p>UGPA1_ARATH UTP--glucose-1-phosphate uridylyltransferase 1</p> <p>GMD1_ARATH GDP-mannose 4,6 dehydratase 1</p> <p>RMLCD_ARATH Bifunctional dTDP-4-dehydrorhamnose 3,5-epimerase/dTDP-4-dehydrorhamnose reductase</p> <p>H2AV3_ARATH Probable histone H2A variant 3</p> <p>MBD10_ARATH Methyl-CpG-binding domain-containing protein 10</p> |
|------------|--------------------------------------------------|------------------------------------------------------------|-------------------------------------------------------------------------------------------------------------------------------------------------------------------------------------------------|-------|----|-----------------------------------------------------------------------------------------------------------------------------------------------------------------------------------------------------------------------------------------------------------------------------------------------------------------------------------------------------------------------------------------------------------------------------------------------------------------------------------------------------------------------------------------------------------------------------------------------------------------------------------------------------------------------------------------------------------------------------------------------------------------------------------------------------------------------------------------------------------------------------------------------------------------------------------------------------------------------------------------------------------------------------------------------------------------------------------------------------------------------------------------------------------------------------------------------------------------------------------------------------------------------------------------------------------------------------------------------------------------------------------------------------------------------------------------------------------------------------------------------------------------------------------------------------------------------------------------------------------------|

|            |                                       |                                    |                                                                                                         |       |    |                                                                                                                                                                                                                                                                                                                                                                                                                                                                                                                                                                                                                                                                                                                                                                                                                                                                                                                                                                                                                                                                                                                                                                                                                                                                                                                                                                                                            |
|------------|---------------------------------------|------------------------------------|---------------------------------------------------------------------------------------------------------|-------|----|------------------------------------------------------------------------------------------------------------------------------------------------------------------------------------------------------------------------------------------------------------------------------------------------------------------------------------------------------------------------------------------------------------------------------------------------------------------------------------------------------------------------------------------------------------------------------------------------------------------------------------------------------------------------------------------------------------------------------------------------------------------------------------------------------------------------------------------------------------------------------------------------------------------------------------------------------------------------------------------------------------------------------------------------------------------------------------------------------------------------------------------------------------------------------------------------------------------------------------------------------------------------------------------------------------------------------------------------------------------------------------------------------------|
| GO:0006520 | cellular amino acid metabolic process | GO:0044238, GO:1901564, GO:0019752 | primary metabolic process, organonitrogen compound metabolic process, carboxylic acid metabolic process | 45.84 | 35 | SYTM1_ARATH Threonine--tRNA ligase, mitochondrial 1<br>SYHC_ARATH Histidine--tRNA ligase, cytoplasmic<br>LEU31_ARATH 3-isopropylmalate dehydrogenase 1, chloroplastic<br>LEU32_ARATH 3-isopropylmalate dehydrogenase 2, chloroplastic<br>LEU33_ARATH 3-isopropylmalate dehydrogenase 3, chloroplastic<br>LEUD3_ARATH 3-isopropylmalate dehydratase small subunit 3<br>C83B1_ARATH Cytochrome P450 83B1<br>APK1_ARATH Adenylyl-sulfate kinase 1, chloroplastic<br>GSHB_ARATH Glutathione synthetase, chloroplastic<br>TRPB1_ARATH Tryptophan synthase beta chain 1, chloroplastic<br>HIS2_ARATH Histidine biosynthesis bifunctional protein hisIE, chloroplastic<br>GLUT1_ARATH Glutamate synthase 1 [NADH], chloroplastic<br>HIS4_ARATH Imidazole glycerol phosphate synthase hisHF, chloroplastic<br>ILVB_ARATH Acetolactate synthase, chloroplastic<br>GCSP2_ARATH Glycine dehydrogenase (decarboxylating) 2, mitochondrial<br>ODO2A_ARATH Dihydrolipoyllysine-residue succinyltransferase component of 2-oxoglutarate dehydrogenase complex 1, mitochondrial<br>ODO2B_ARATH Dihydrolipoyllysine-residue succinyltransferase component of 2-oxoglutarate dehydrogenase complex 2, mitochondrial<br>PDX13_ARATH Pyridoxal 5'-phosphate synthase subunit PDX1.3<br>SERA2_ARATH D-3-phosphoglycerate dehydrogenase 2, chloroplastic<br>GCSP1_ARATH Glycine dehydrogenase (decarboxylating) 1, mitochondrial |
|------------|---------------------------------------|------------------------------------|---------------------------------------------------------------------------------------------------------|-------|----|------------------------------------------------------------------------------------------------------------------------------------------------------------------------------------------------------------------------------------------------------------------------------------------------------------------------------------------------------------------------------------------------------------------------------------------------------------------------------------------------------------------------------------------------------------------------------------------------------------------------------------------------------------------------------------------------------------------------------------------------------------------------------------------------------------------------------------------------------------------------------------------------------------------------------------------------------------------------------------------------------------------------------------------------------------------------------------------------------------------------------------------------------------------------------------------------------------------------------------------------------------------------------------------------------------------------------------------------------------------------------------------------------------|

|            |                            |                        |                                               |       |    |                                                                                                                                                                                                                                                                                                                                                                                                                                                                                                                                                                                                                                                                                                                                                                                                                                                                                                                                                                                                                                                                                                                                                                                                                                                                                                                                                                                                                                                                                             |
|------------|----------------------------|------------------------|-----------------------------------------------|-------|----|---------------------------------------------------------------------------------------------------------------------------------------------------------------------------------------------------------------------------------------------------------------------------------------------------------------------------------------------------------------------------------------------------------------------------------------------------------------------------------------------------------------------------------------------------------------------------------------------------------------------------------------------------------------------------------------------------------------------------------------------------------------------------------------------------------------------------------------------------------------------------------------------------------------------------------------------------------------------------------------------------------------------------------------------------------------------------------------------------------------------------------------------------------------------------------------------------------------------------------------------------------------------------------------------------------------------------------------------------------------------------------------------------------------------------------------------------------------------------------------------|
| GO:0044248 | cellular catabolic process | GO:0009056, GO:0044237 | catabolic process, cellular metabolic process | 11.55 | 34 | <p>GLO2C_ARATH Hydroxyacylglutathione hydrolase cytoplasmic</p> <p>JAL28_ARATH Nitrile-specifier protein 1</p> <p>APXS_ARATH L-ascorbate peroxidase S, chloroplastic/mitochondrial</p> <p>PER57_ARATH Peroxidase 57</p> <p>PER30_ARATH Peroxidase 30</p> <p>PER22_ARATH Peroxidase 22</p> <p>PER15_ARATH Peroxidase 15</p> <p>PER42_ARATH Peroxidase 42</p> <p>GSTF7_ARATH Glutathione S-transferase F7</p> <p>XCP2_ARATH Cysteine protease XCP2</p> <p>PRS6B_ARATH 26S proteasome regulatory subunit 6B homolog</p> <p>PS12A_ARATH 26S proteasome non-ATPase regulatory subunit 12 homolog A</p> <p>GSTF9_ARATH Glutathione S-transferase F9</p> <p>GSTF6_ARATH Glutathione S-transferase F6</p> <p>BGL22_ARATH Beta-glucosidase 22</p> <p>BGL21_ARATH Beta-glucosidase 21</p> <p>GCSP2_ARATH Glycine dehydrogenase (decarboxylating) 2, mitochondrial</p> <p>DCI1_ARATH Delta(3,5)-Delta(2,4)-dienoyl-CoA isomerase, peroxisomal</p> <p>THIC2_ARATH Probable acetyl-CoA acetyltransferase, cytosolic 2</p> <p>ODO2A_ARATH Dihydrolipoyllysine-residue succinyltransferase component of 2-oxoglutarate dehydrogenase complex 1, mitochondrial</p> <p>ODO2B_ARATH Dihydrolipoyllysine-residue succinyltransferase component of 2-oxoglutarate dehydrogenase complex 2, mitochondrial</p> <p>CINV2_ARATH Alkaline/neutral invertase CINV2</p> <p>LGUC_ARATH Probable lactoylglutathione lyase, chloroplastic</p> <p>GCSP1_ARATH Glycine dehydrogenase (decarboxylating) 1, mitochondrial</p> |
|------------|----------------------------|------------------------|-----------------------------------------------|-------|----|---------------------------------------------------------------------------------------------------------------------------------------------------------------------------------------------------------------------------------------------------------------------------------------------------------------------------------------------------------------------------------------------------------------------------------------------------------------------------------------------------------------------------------------------------------------------------------------------------------------------------------------------------------------------------------------------------------------------------------------------------------------------------------------------------------------------------------------------------------------------------------------------------------------------------------------------------------------------------------------------------------------------------------------------------------------------------------------------------------------------------------------------------------------------------------------------------------------------------------------------------------------------------------------------------------------------------------------------------------------------------------------------------------------------------------------------------------------------------------------------|

|            |                                           |            |                                     |      |    |                                                                                                                                                                                                                                                                                                                                                                                                                                                                                                                                                                                                                                                                                                                                                                                                                                                                                                                                                                                                                                                                                                                                                                                                                                                                                                                                                                                                                   |
|------------|-------------------------------------------|------------|-------------------------------------|------|----|-------------------------------------------------------------------------------------------------------------------------------------------------------------------------------------------------------------------------------------------------------------------------------------------------------------------------------------------------------------------------------------------------------------------------------------------------------------------------------------------------------------------------------------------------------------------------------------------------------------------------------------------------------------------------------------------------------------------------------------------------------------------------------------------------------------------------------------------------------------------------------------------------------------------------------------------------------------------------------------------------------------------------------------------------------------------------------------------------------------------------------------------------------------------------------------------------------------------------------------------------------------------------------------------------------------------------------------------------------------------------------------------------------------------|
| GO:1901135 | carbohydrate derivative metabolic process | GO:0071704 | organic substance metabolic process | 9.87 | 32 | <p>JAL28_ARATH Nitrile-specifier protein 1</p> <p>UGE1_ARATH Bifunctional UDP-glucose 4-epimerase and UDP-xylose 4-epimerase 1</p> <p>ATP5H_ARATH ATP synthase subunit d, mitochondrial</p> <p>ATPO_ARATH ATP synthase subunit O, mitochondrial</p> <p>LEU33_ARATH 3-isopropylmalate dehydrogenase 3, chloroplastic</p> <p>LEUD3_ARATH 3-isopropylmalate dehydratase small subunit 3</p> <p>MAM1_ARATH Methylthioalkylmalate synthase 1, chloroplastic</p> <p>C83B1_ARATH Cytochrome P450 83B1</p> <p>IGMT1_ARATH Indole glucosinolate O-methyltransferase 1</p> <p>APK1_ARATH Adenylyl-sulfate kinase 1, chloroplastic</p> <p>BGL22_ARATH Beta-glucosidase 22</p> <p>BGL21_ARATH Beta-glucosidase 21</p> <p>UGPA1_ARATH UTP--glucose-1-phosphate uridylyltransferase 1</p> <p>G6PD2_ARATH Glucose-6-phosphate 1-dehydrogenase 2, chloroplastic</p> <p>PMM_ARATH Phosphomannomutase</p> <p>KDSA1_ARATH 2-dehydro-3-deoxyphosphooctonate aldolase 1</p> <p>GMD1_ARATH GDP-mannose 4,6 dehydratase 1</p> <p>KPRS5_ARATH Ribose-phosphate pyrophosphokinase 5, chloroplastic</p> <p>ATPA_ARATH ATP synthase subunit alpha, chloroplastic</p> <p>RMLCD_ARATH Bifunctional dTDP-4-dehydrorhamnose 3,5-epimerase/dTDP-4-dehydrorhamnose reductase</p> <p>APT3_ARATH Adenine phosphoribosyltransferase 3</p> <p>PYRC_ARATH Dihydroorotase, mitochondrial</p> <p>IMDH2_ARATH Inosine-5'-monophosphate dehydrogenase 2</p> |
|------------|-------------------------------------------|------------|-------------------------------------|------|----|-------------------------------------------------------------------------------------------------------------------------------------------------------------------------------------------------------------------------------------------------------------------------------------------------------------------------------------------------------------------------------------------------------------------------------------------------------------------------------------------------------------------------------------------------------------------------------------------------------------------------------------------------------------------------------------------------------------------------------------------------------------------------------------------------------------------------------------------------------------------------------------------------------------------------------------------------------------------------------------------------------------------------------------------------------------------------------------------------------------------------------------------------------------------------------------------------------------------------------------------------------------------------------------------------------------------------------------------------------------------------------------------------------------------|

|            |                              |            |                            |       |    |                                                                                                                                                                                                                                                                                                                                                                                                                                                                                                                                                                                                                                                                                                                                                                                                                                                                                                                                                                                                                                                                                                                                                                                                                                                                                                                                                                                                       |
|------------|------------------------------|------------|----------------------------|-------|----|-------------------------------------------------------------------------------------------------------------------------------------------------------------------------------------------------------------------------------------------------------------------------------------------------------------------------------------------------------------------------------------------------------------------------------------------------------------------------------------------------------------------------------------------------------------------------------------------------------------------------------------------------------------------------------------------------------------------------------------------------------------------------------------------------------------------------------------------------------------------------------------------------------------------------------------------------------------------------------------------------------------------------------------------------------------------------------------------------------------------------------------------------------------------------------------------------------------------------------------------------------------------------------------------------------------------------------------------------------------------------------------------------------|
| GO:0006793 | phosphorus metabolic process | GO:0044237 | cellular metabolic process | 23.54 | 31 | ITPK1_ARATH Inositol-tetrakisphosphate 1-kinase 1<br>UGE1_ARATH Bifunctional UDP-glucose 4-epimerase and UDP-xylose 4-epimerase 1<br>ATP5H_ARATH ATP synthase subunit d, mitochondrial<br>ATPO_ARATH ATP synthase subunit O, mitochondrial<br>APK1_ARATH Adenylyl-sulfate kinase 1, chloroplastic<br>UGPA1_ARATH UTP--glucose-1-phosphate uridylyltransferase 1<br>G6PD2_ARATH Glucose-6-phosphate 1-dehydrogenase 2, chloroplastic<br>GPP2_ARATH (DL)-glycerol-3-phosphatase 2<br>PLDA1_ARATH Phospholipase D alpha 1<br>ODO2A_ARATH Dihydrolipoyllysine-residue succinyltransferase component of 2-oxoglutarate dehydrogenase complex 1, mitochondrial<br>GMD1_ARATH GDP-mannose 4,6 dehydratase 1<br>IPYR2_ARATH Soluble inorganic pyrophosphatase 2<br>KPRS5_ARATH Ribose-phosphate pyrophosphokinase 5, chloroplastic<br>ODO2B_ARATH Dihydrolipoyllysine-residue succinyltransferase component of 2-oxoglutarate dehydrogenase complex 2, mitochondrial<br>PDX13_ARATH Pyridoxal 5'-phosphate synthase subunit PDX1.3<br>ATPA_ARATH ATP synthase subunit alpha, chloroplastic<br>RMLCD_ARATH Bifunctional dTDP-4-dehydrorhamnose 3,5-epimerase/dTDP-4-dehydrorhamnose reductase<br>APT3_ARATH Adenine phosphoribosyltransferase 3<br>PYRC_ARATH Dihydroorotase, mitochondrial<br>GPP1_ARATH (DL)-glycerol-3-phosphatase 1, mitochondrial<br>IMDH2_ARATH Inosine-5'-monophosphate dehydrogenase 2 |
|------------|------------------------------|------------|----------------------------|-------|----|-------------------------------------------------------------------------------------------------------------------------------------------------------------------------------------------------------------------------------------------------------------------------------------------------------------------------------------------------------------------------------------------------------------------------------------------------------------------------------------------------------------------------------------------------------------------------------------------------------------------------------------------------------------------------------------------------------------------------------------------------------------------------------------------------------------------------------------------------------------------------------------------------------------------------------------------------------------------------------------------------------------------------------------------------------------------------------------------------------------------------------------------------------------------------------------------------------------------------------------------------------------------------------------------------------------------------------------------------------------------------------------------------------|

|            |                            |                           |                                                  |       |    |                                                                                                                                                                                                                                                                                                                                                                                                                                                                                                                                                                                                                                                                                                                                                                                                                                                                                                                                                                                                                                                                                                                                                                                                                                                                                                                                                                                                                  |
|------------|----------------------------|---------------------------|--------------------------------------------------|-------|----|------------------------------------------------------------------------------------------------------------------------------------------------------------------------------------------------------------------------------------------------------------------------------------------------------------------------------------------------------------------------------------------------------------------------------------------------------------------------------------------------------------------------------------------------------------------------------------------------------------------------------------------------------------------------------------------------------------------------------------------------------------------------------------------------------------------------------------------------------------------------------------------------------------------------------------------------------------------------------------------------------------------------------------------------------------------------------------------------------------------------------------------------------------------------------------------------------------------------------------------------------------------------------------------------------------------------------------------------------------------------------------------------------------------|
| GO:0006970 | response to osmotic stress | GO:0006950,<br>GO:0009628 | response to stress, response to abiotic stimulus | 16.08 | 24 | <p>ATP5H_ARATH ATP synthase subunit d, mitochondrial</p> <p>UGPA1_ARATH UTP--glucose-1-phosphate uridylyltransferase 1</p> <p>PDX13_ARATH Pyridoxal 5'-phosphate synthase subunit PDX1.3</p> <p>PIP12_ARATH Aquaporin PIP1-2</p> <p>OSL3_ARATH Osmotin-like protein OSM34</p> <p>PER22_ARATH Peroxidase 22</p> <p>GSTF7_ARATH Glutathione S-transferase F7</p> <p>NAI2_ARATH TSA1-like protein</p> <p>CX6B1_ARATH Cytochrome c oxidase subunit 6b-1</p> <p>HS905_ARATH Heat shock protein 90-5, chloroplastic</p> <p>EIF3E_ARATH Eukaryotic translation initiation factor 3 subunit E</p> <p>BTF3L_ARATH Nascent polypeptide-associated complex subunit beta</p> <p>NACA1_ARATH Nascent polypeptide-associated complex subunit alpha-like protein 1</p> <p>NACA3_ARATH Nascent polypeptide-associated complex subunit alpha-like protein 3</p> <p>LEU31_ARATH 3-isopropylmalate dehydrogenase 1, chloroplastic</p> <p>LEU33_ARATH 3-isopropylmalate dehydrogenase 3, chloroplastic</p> <p>LEUD3_ARATH 3-isopropylmalate dehydratase small subunit 3</p> <p>GSTF6_ARATH Glutathione S-transferase F6</p> <p>TRPB1_ARATH Tryptophan synthase beta chain 1, chloroplastic</p> <p>BGL22_ARATH Beta-glucosidase 22</p> <p>BGL21_ARATH Beta-glucosidase 21</p> <p>PMM_ARATH Phosphomannomutase</p> <p>MAO1_ARATH NAD-dependent malic enzyme 1, mitochondrial</p> <p>FUM1_ARATH Fumarate hydratase 1, mitochondrial</p> |
|------------|----------------------------|---------------------------|--------------------------------------------------|-------|----|------------------------------------------------------------------------------------------------------------------------------------------------------------------------------------------------------------------------------------------------------------------------------------------------------------------------------------------------------------------------------------------------------------------------------------------------------------------------------------------------------------------------------------------------------------------------------------------------------------------------------------------------------------------------------------------------------------------------------------------------------------------------------------------------------------------------------------------------------------------------------------------------------------------------------------------------------------------------------------------------------------------------------------------------------------------------------------------------------------------------------------------------------------------------------------------------------------------------------------------------------------------------------------------------------------------------------------------------------------------------------------------------------------------|

|            |                                     |                        |                                                        |      |    |                                                                                                                                                                                                                                                                                                                                                                                                                                                                                                                                                                                                                                                                                                                                                                                                                                                                                                                                                                                                                                                                                                                                                                                      |
|------------|-------------------------------------|------------------------|--------------------------------------------------------|------|----|--------------------------------------------------------------------------------------------------------------------------------------------------------------------------------------------------------------------------------------------------------------------------------------------------------------------------------------------------------------------------------------------------------------------------------------------------------------------------------------------------------------------------------------------------------------------------------------------------------------------------------------------------------------------------------------------------------------------------------------------------------------------------------------------------------------------------------------------------------------------------------------------------------------------------------------------------------------------------------------------------------------------------------------------------------------------------------------------------------------------------------------------------------------------------------------|
| GO:1901575 | organic substance catabolic process | GO:0009056, GO:0071704 | catabolic process, organic substance metabolic process | 7.52 | 24 | <p>PLDA1_ARATH Phospholipase D alpha 1</p> <p>ODO2A_ARATH Dihydrolipoyllysine-residue succinyltransferase component of 2-oxoglutarate dehydrogenase complex 1, mitochondrial</p> <p>ODO2B_ARATH Dihydrolipoyllysine-residue succinyltransferase component of 2-oxoglutarate dehydrogenase complex 2, mitochondrial</p> <p>GLO2C_ARATH Hydroxyacylglutathione hydrolase cytoplasmic</p> <p>JAL28_ARATH Nitrile-specifier protein 1</p> <p>XCP2_ARATH Cysteine protease XCP2</p> <p>PRS6B_ARATH 26S proteasome regulatory subunit 6B homolog</p> <p>PS12A_ARATH 26S proteasome non-ATPase regulatory subunit 12 homolog A</p> <p>GDL18_ARATH GDSL esterase/lipase 22</p> <p>BGL22_ARATH Beta-glucosidase 22</p> <p>BGL21_ARATH Beta-glucosidase 21</p> <p>GCSP2_ARATH Glycine dehydrogenase (decarboxylating) 2, mitochondrial</p> <p>DCI1_ARATH Delta(3,5)-Delta(2,4)-dienoyl-CoA isomerase, peroxisomal</p> <p>THIC2_ARATH Probable acetyl-CoA acetyltransferase, cytosolic 2</p> <p>CINV2_ARATH Alkaline/neutral invertase CINV2</p> <p>LGUC_ARATH Probable lactoylglutathione lyase, chloroplastic</p> <p>GCSP1_ARATH Glycine dehydrogenase (decarboxylating) 1, mitochondrial</p> |
|------------|-------------------------------------|------------------------|--------------------------------------------------------|------|----|--------------------------------------------------------------------------------------------------------------------------------------------------------------------------------------------------------------------------------------------------------------------------------------------------------------------------------------------------------------------------------------------------------------------------------------------------------------------------------------------------------------------------------------------------------------------------------------------------------------------------------------------------------------------------------------------------------------------------------------------------------------------------------------------------------------------------------------------------------------------------------------------------------------------------------------------------------------------------------------------------------------------------------------------------------------------------------------------------------------------------------------------------------------------------------------|

Table S4. List of proteins differentially abundant in roots of both *plda1-1* and *plda1-2* mutants (in comparison with control) containing mitochondrial targeting presequence as predicted by MitoFates [73].

| Sequence ID                                                                                                               | Probability of presequence | Cleavage site (processing enzyme) | Net charge | Positions for TOM20 recognition motif (delimited by comma) | Position of amphipathic alpha-helix | BHHPPP | BPHBHH | HBHHBb | HHBHBB | HHBPHH | HHBPHP | HHHBHH | HHHBPH | HHHHBB | HHPBHH | HHPBHP | PHHBPH |
|---------------------------------------------------------------------------------------------------------------------------|----------------------------|-----------------------------------|------------|------------------------------------------------------------|-------------------------------------|--------|--------|--------|--------|--------|--------|--------|--------|--------|--------|--------|--------|
| sp Q9FLQ4 ODO2A_ARATH Dihydrolipoyllysine-residue succinyltransferase component of 2-oxoglutarate dehydrogenase complex 1 | 1                          | 85(MPP), 86(Icp55*)               | 0.106      | 2-6,79-83                                                  | 2-11-high                           | -      | -      | -      | -      | -      | -      | 5.10   | -      | -      | -      | -      | -      |
| sp Q8S528 AL2B7_ARATH Aldehyde dehydrogenase family 2 member B7                                                           | 0.998                      | 26(MPP)                           | 0.192      | 93-97                                                      | 4-14-high                           | -      | -      | -      | -      | -      | -      | -      | -      | -      | -      | -      | -      |
| sp Q96251 ATPO_ARATH ATP synthase subunit O                                                                               | 0.996                      | 35(MPP), 36(Icp55*)               | 0.143      |                                                            | 1-10-low                            | -      | -      | -      | -      | 11.16  | -      | -      | -      | -      | -      | -      | 10.15  |
| sp O04904 PYRC_ARATH Dihydroorotase                                                                                       | 0.996                      | 33(MPP)                           | 0.182      | 52-56,64-68,86-90,90-94                                    | 1-10-high                           | -      | -      | -      | -      | 1.6    | -      | -      | -      | -      | -      | -      | -      |
| sp O04630 SYTM1_ARATH Threonine--tRNA ligase,                                                                             | 0.992                      | 13(MPP)                           | 0.308      |                                                            | 2-13-high                           | -      | -      | -      | -      | -      | -      | -      | -      | -      | -      | -      | -      |
| sp Q8H107 ODO2B_ARATH Dihydrolipoyllysine-residue succinyltransferase component of 2-oxoglutarate dehydrogenase complex 2 | 0.991                      | 29(MPP)                           | 0.172      | 2-6,7-11,78-82                                             | 2-11-high                           | -      | -      | -      | -      | -      | 20-25  | 5.10   | 19-24  | -      | -      | -      | -      |
| sp Q9SIU0 MAO1_ARATH NAD-dependent malic enzyme 1                                                                         | 0.989                      | 22(MPP)                           | 0.227      | 14-18,86-90                                                | 13-22-high                          | -      | -      | -      | -      | -      | -      | -      | -      | -      | -      | -      | -      |
| sp P93033 FUM1_ARATH Fumarate hydratase 1                                                                                 | 0.978                      | 27(MPP), 28(Icp55*)               | 0.148      | 18-22,74-78,81-85                                          | 21-30-low                           | -      | -      | -      | -      | -      | -      | -      | -      | -      | -      | -      | -      |
| sp P40941 ADT2_ARATH ADP,ATP carrier protein 2                                                                            | 0.977                      | 29(MPP), 30(Icp55*)               | 0          |                                                            | 10-19-high                          | -      | -      | -      | -      | -      | -      | -      | -      | -      | -      | -      | -      |

|                                                                                       |       |                        |       |             |            |           |       |       |       |   |     |     |   |     |     |     |   |
|---------------------------------------------------------------------------------------|-------|------------------------|-------|-------------|------------|-----------|-------|-------|-------|---|-----|-----|---|-----|-----|-----|---|
| sp Q9LJL3 PREP1_ARATH<br>Presequence protease 1                                       | 0.97  | 27(MPP)                | 0.185 | 17-21       | 19-28-high | -         | -     | -     | 17-22 | - | 1.6 | -   | - | -   | -   | -   | - |
| sp Q9FN42 CLPP2_ARAT<br>H ATP-dependent Clp<br>protease proteolytic subunit<br>2      | 0.963 | 29(MPP),<br>30(Icp55*) | 0.138 | 50-54       | 1-10-high  | 10.1<br>5 | -     | -     | -     | - | -   | -   | - | -   | -   | -   | - |
| sp Q42577 NDUS7_ARAT<br>H NADH dehydrogenase<br>[ubiquinone] iron-sulfur<br>protein 7 | 0.948 | 21(MPP)                | 0.143 | 61-65       | 4-13-low   | -         | -     | -     | -     | - | -   | -   | - | -   | -   | -   | - |
| sp P93736 SYVM1_ARAT<br>H Valine--tRNA ligase                                         | 0.94  | 38(MPP)                | 0.132 |             | 4-13-high  | -         | -     | -     | -     | - | -   | 4.9 | - | 3.8 | -   | -   | - |
| sp O49543 MNIF1_ARATH<br>Cysteine desulfurase                                         | 0.923 | 26(MPP),<br>27(Icp55*) | 0.231 | 2.6         | 6-16-high  | -         | -     | -     | -     | - | -   | -   | - | -   | 1.6 | 2.7 | - |
| sp Q9LKA5 MORF8_ARA<br>TH Multiple organellar<br>RNA editing factor 8                 | 0.859 | 25(MPP),<br>26(Icp55*) | 0.16  |             | 9-18-high  | -         | -     | -     | -     | - | -   | -   | - | -   | -   | -   | - |
| sp F4JTE7 GPP1_ARATH<br>(DL)-glycerol-3-<br>phosphatase 1                             | 0.726 | 46(MPP)                | 0.196 | 71-75       | 1-10-high  | -         | -     | -     | -     | - | -   | -   | - | -   | -   | -   | - |
| sp Q9FHG2 RL322_ARAT<br>H 60S ribosomal protein<br>L32-2                              | 0.547 | 21(MPP)                | 0.333 | 72-76       | 11-20-high | -         | 14-19 | 16-21 | -     | - | -   | -   | - | -   | -   | -   | - |
| sp Q9LE82 RAGP1_ARAT<br>H RAN GTPase-activating<br>protein 1                          | 0.514 | 26(MPP)                | 0.154 | 84-88       | 1-12-high  | -         | -     | -     | -     | - | -   | -   | - | -   | -   | -   | - |
| sp Q9XGM1 VATD_ARAT<br>H V-type proton ATPase<br>subunit D                            | 0.5   | 30(MPP)                | 0.133 | 49-53,81-85 | 15-24-low  | -         | -     | -     | -     | - | -   | -   | - | -   | -   | -   | - |
| sp O80988 GCSP2_ARATH<br>Glycine dehydrogenase<br>(decarboxylating) 2                 | 0.402 | 41(MPP)                | 0.171 | 4-8,13-17   | 9-18-high  | -         | -     | -     | -     | - | -   | -   | - | -   | -   | -   | - |

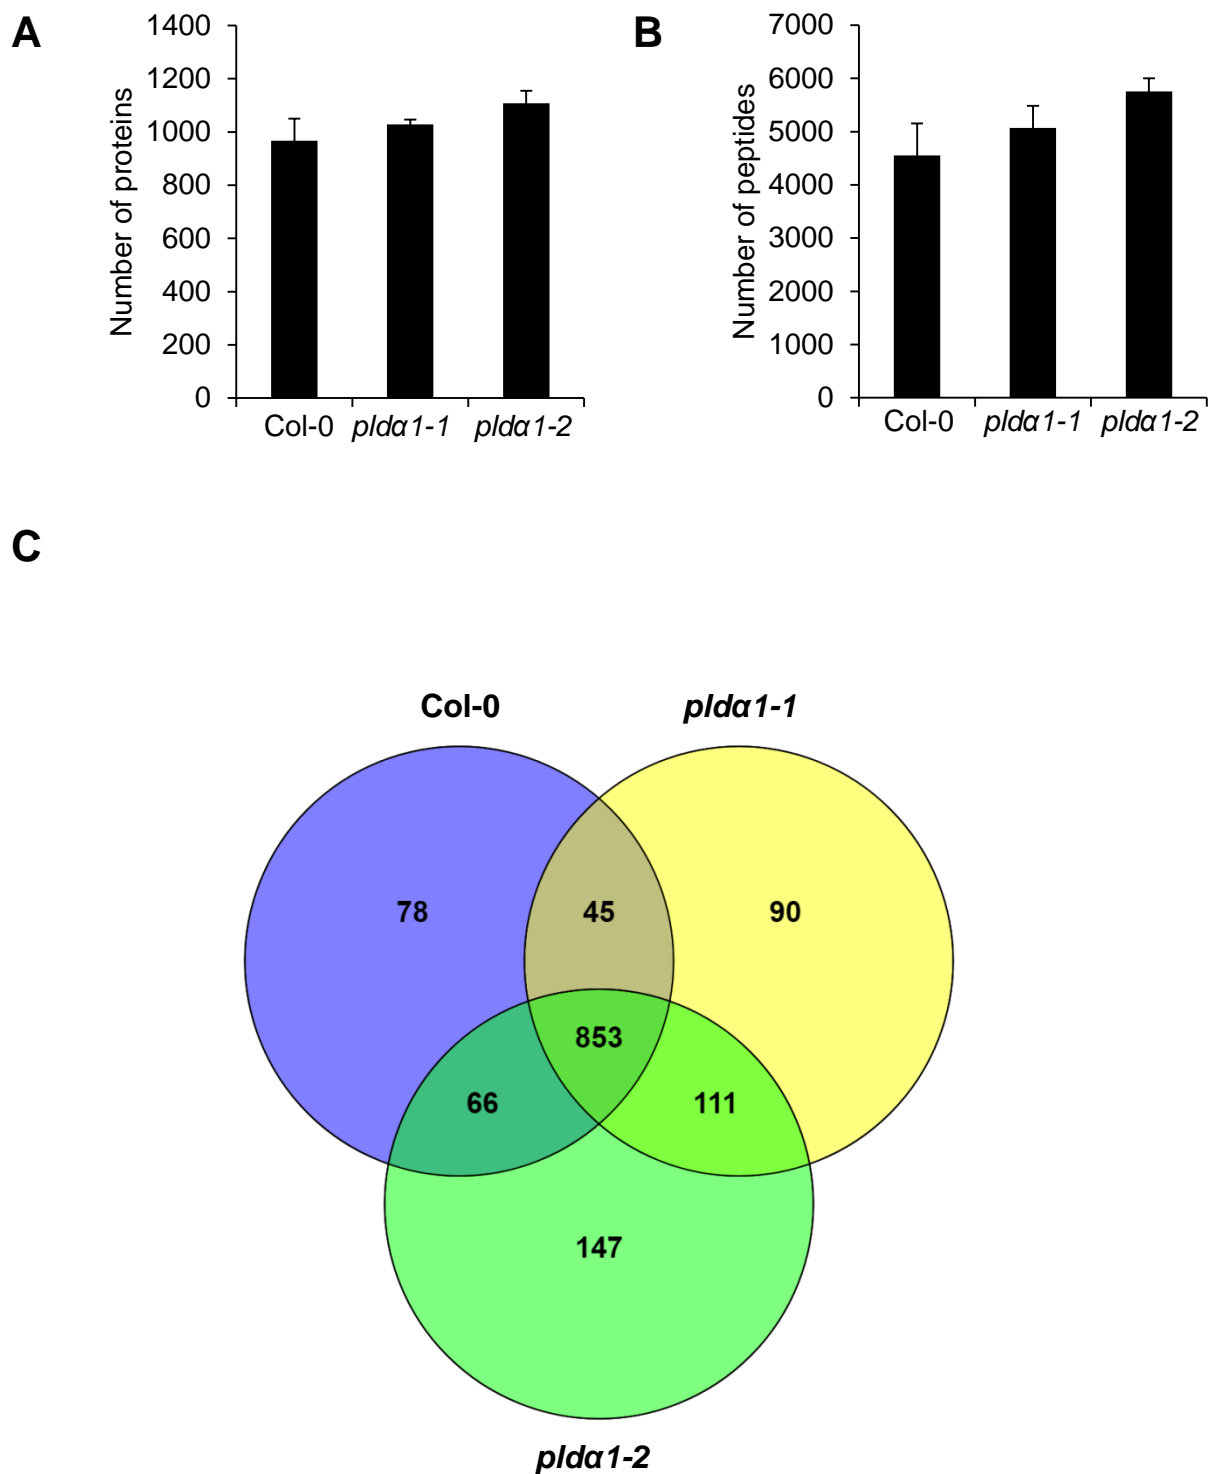

Figure S1. Evaluation of the total proteome of the studied Arabidopsis lines. (A) Graph showing the average number of identified proteins in the total proteomes of Col-0, *plda1-1* and *plda1-2* roots. (B) Graph showing the average number of identified peptides in Col-0, *plda1-1* and *plda1-2* roots. The errorr bars in (A) and (B) represent standard deviations across 4 biological replicates. (C) Venn diagram showing the overlapping and unique proteins identified in Col-0, *plda1-1* and *plda1-2* mutant roots. Proteins present at least two biological replicates were evaluated.

**A**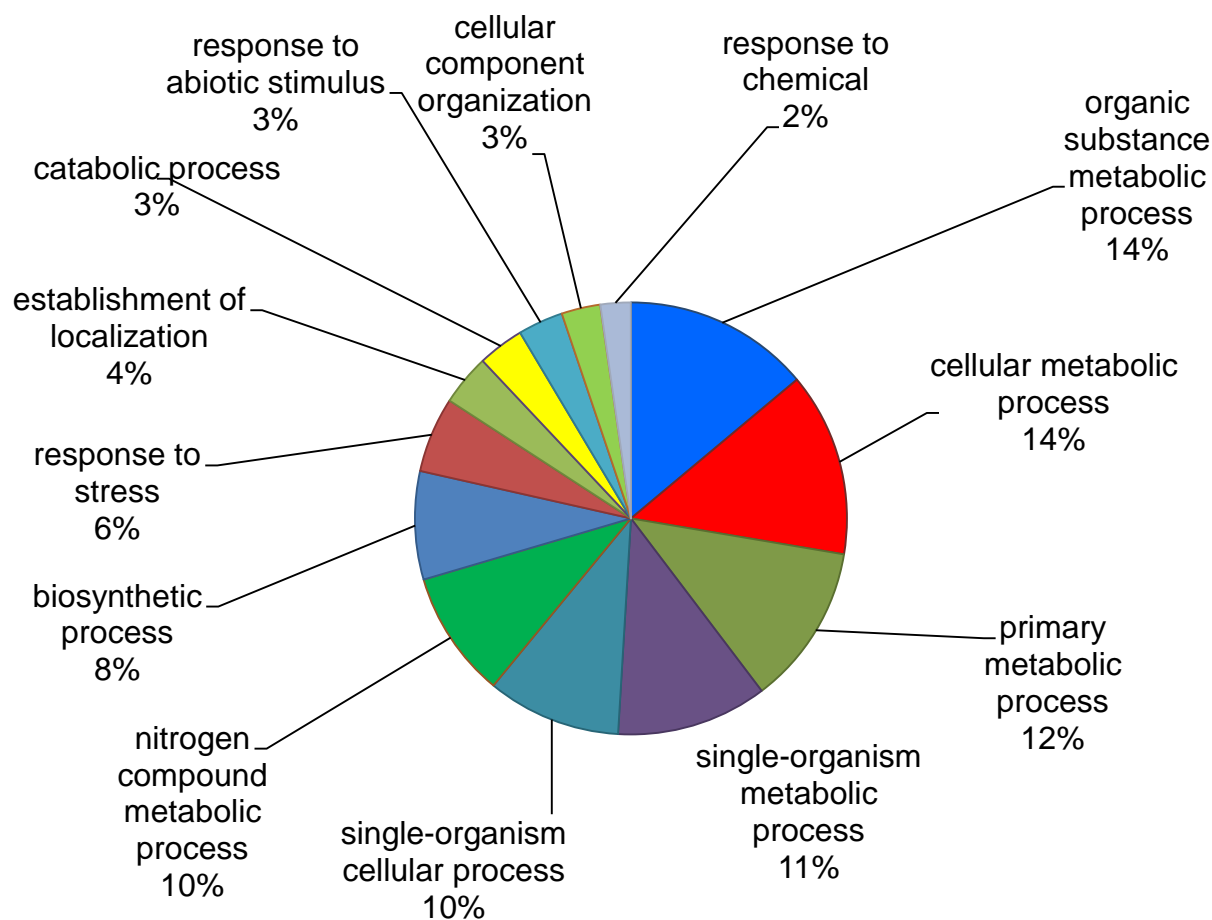**B**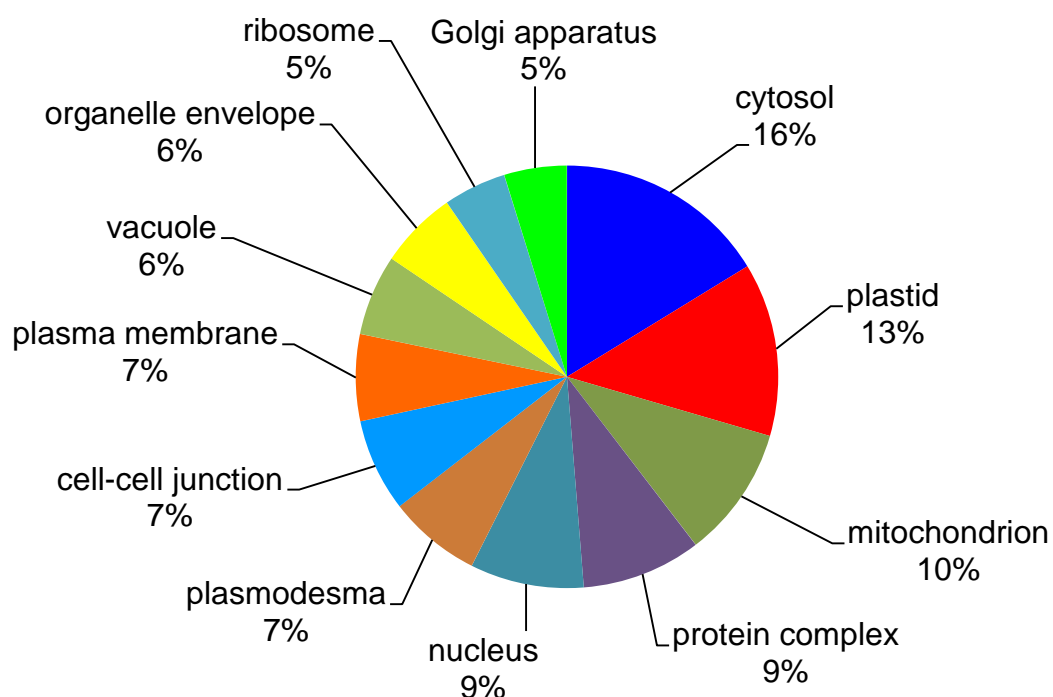

**Figure S2** Functional classification of differentially abundant proteins found in roots of *plda1-1* and *plda1-2* mutants using Gene ontology annotation according to biological process (A; third level of ontology) and compartment (B).
